1 **Modern human origins: multiregional evolution of autosomes**  
2 **and East Asia origin of Y and mtDNA**

3

4 Dejian Yuan<sup>1</sup>, Xiaoyun Lei<sup>1</sup>, Yuanyuan Gui<sup>1</sup>, Mingrui Wang<sup>1</sup>, Ye Zhang<sup>1</sup>, Zuobin Zhu<sup>2</sup>,  
5 Dapeng Wang<sup>3</sup>, Jun Yu<sup>3</sup>, and Shi Huang<sup>1\*</sup>

6

7 <sup>1</sup>State Key Laboratory of Medical Genetics, School of Life Sciences, Xiangya Medical  
8 School, Central South University, 110 Xiangya Road, Changsha, Hunan 410078, P.R.  
9 China

10

11 <sup>2</sup>Department of Genetics, Xuzhou Medical University, Xuzhou, Jiangsu 221004, China.

12

13 <sup>3</sup>CAS Key Laboratory of Genome Sciences and Information, Beijing Institute of Genomics,  
14 Chinese Academy of Sciences, Beijing 100029, P.R. China

15

16 \*Corresponding author: [huangshi@sklmg.edu.cn](mailto:huangshi@sklmg.edu.cn), tel 86-731-84805342

17 Dejian Yuan, [yuandejian@163.com](mailto:yuandejian@163.com)

18 Xiaoyun Lei, [leixiaoyun@sklmg.edu.cn](mailto:leixiaoyun@sklmg.edu.cn)

19 Yuanyuan Gui, [guiyuanyuan@sklmg.edu.cn](mailto:guiyuanyuan@sklmg.edu.cn)

20 Mingrui Wang, [wangmingrui@sklmg.edu.cn](mailto:wangmingrui@sklmg.edu.cn)

21 Ye Zhang, [zhangye@sklmg.edu.cn](mailto:zhangye@sklmg.edu.cn)

22 Zuobin Zhu, [zhuzuobin2010@163.com](mailto:zhuzuobin2010@163.com)

23 Dapeng Wang, [wangdp123@gmail.com](mailto:wangdp123@gmail.com)

24 Jun Yu, [junyu@big.ac.cn](mailto:junyu@big.ac.cn)

25

26 **Key words:** Multiregional; Out-of-Africa; neutral theory; maximum genetic diversity (MGD)  
27 hypothesis; Neanderthals; Denisovans; Heidelbergensis; Aboriginal Australians; Negritos

28

29 **Abstract**

30

31 The neutral theory has been used as a null model for interpreting nature and produced  
32 the Recent Out of Africa model of anatomically modern humans. Recent studies, however,  
33 have established that genetic diversities are mostly at maximum saturation levels  
34 maintained by selection, therefore challenging the explanatory power of the neutral  
35 theory and rendering the present molecular model of human origins untenable. Using  
36 improved methods and public data, we have revisited human evolution and found sharing  
37 of genetic variations among racial groups to be largely a result of parallel mutations rather  
38 than recent common ancestry and admixture as commonly assumed. We derived an age  
39 of 1.86-1.92 million years for the first split in modern human populations based on  
40 autosomal diversity data. We found evidence of modern Y and mtDNA originating in East  
41 Asia and dispersing via hybridization with archaic humans. Analyses of autosomes, Y and  
42 mtDNA all suggest that Denisovan and Neanderthal were archaic Africans with Eurasian  
43 admixtures and ancestors of South Asia Negritos and Aboriginal Australians. Verifying  
44 our model, we found more ancestry of Southern Chinese from Hunan in Africans relative  
45 to other East Asian groups examined. These results suggest multiregional evolution of  
46 autosomes and replacements of archaic Y and mtDNA by modern ones originating in  
47 East Asia, thereby leading to a coherent account of modern human origins.

48

49

## 50 **Background**

51 There are two competing models of modern human origins termed “Multiregional” and the  
52 recent “Out-of-Africa” hypothesis [1]. In the Multiregional model [2-4], recent human  
53 evolution is seen as the product of the early and middle Pleistocene radiation of *Homo*  
54 *erectus* from Africa. Thereafter, local differentiation led to the establishment of regional  
55 populations which evolved to produce anatomically modern humans (AMH) in different  
56 regions of the world, made of four major differentiated groups (Africans, Europeans, East  
57 Asians, and Aboriginal Australians). *Homo* has been a single species since the genus  
58 first appeared in the fossil record ~2.3-2.8 million years (myr) ago [2-4]. Support for this  
59 model is based on fossils and Paleolithic cultural remains but consistent molecular  
60 evidence has been lacking. While autosomal data have put a common ancestor of  
61 modern humans at ~1.5 myr ago, it is still far short of 2 myr [5]. In addition to regional  
62 continuity, the model further suggests hybridization among different groups [4]. Seeming  
63 difficulties here are the clear separation between modern and archaic mtDNAs and Y, the  
64 absence of archaic mtDNAs and Y in modern humans [6, 7], and the young age for the  
65 modern Y (~100 ky) and mtDNA (~200 ky) [8-10].

66 The single origin Out of Africa model assumes that there was a relatively recent  
67 common ancestral population for *Homo sapiens* which already showed most if not all of  
68 the anatomical features shared by present day people. This population originated in  
69 Africa ~200 ky ago, followed by an initiation of African regional differentiation, subsequent  
70 radiation from Africa, and final establishment of modern regional characteristics outside  
71 Africa [1, 10]. These modern Africans replaced the archaic *Homo* in Eurasia with limited  
72 genetic mixing [11-15]. Support for this model comes from the African location of the  
73 earliest fossils (~315 ky ago in Jebel Irhoud, Morocco) of mostly but not all AMH features  
74 [16, 17] and the molecular clock or neutral theory interpretation of the greater genetic

75 diversity in Africans [10]. Difficulties with this model include the discrepancy between  
76 autosomal and Y/mtDNA age, the Y haplotype A00 with age >300 ky [18], no evidence of  
77 first appearance of fully modern humans in Africa, seeming data for multiregionalism  
78 within Africa [19] and for multiple dispersals into Asia [20], fossils with AMH features of  
79 greater than 85 ky old (upto ~260 ky) in multiple Eurasia locations (the fully modern teeth  
80 in Daoxian Hunan, Longtanshan cave 1 Yunnan, Luna Cave Guangxi, Xuchang Henan,  
81 Bijie Guizhou, and Dali Shaanxi in China, Misliya and Shkul/Qafzeh in Israel, and Al  
82 Wusta-1 in Arabia) [21-28], and the generally weaker support from fossils and stone tools  
83 relative to the multiregional model. While the AMH fossils found outside Africa have been  
84 assumed to originate in Africa, an origin in Asia has not been excluded. In fact, in 1983,  
85 researchers have derived an mtDNA tree rooted in Asia [29]. Unfortunately, this model  
86 was overlooked without anyone ever explaining why the Asia model was less valid than  
87 the African Mitochondrial Eve model published 4 years later [10].

88 Most fatal to the Out of Africa model, however, is that the theoretical foundation for it,  
89 the molecular clock and neutral theory, is widely known to be incomplete or has yet to  
90 solve the century old riddle of what determines genetic diversity [30]. The neutral theory,  
91 while largely sound as a null model and a framework for pre-saturation evolutionary  
92 processes, has met with great difficulty as an explanatory framework for most molecular  
93 evolutionary phenomena [31-34] and as such should not have been so freely used to  
94 account for genetic diversity patterns. Obviously, inferring human origins by using genetic  
95 diversity data must wait until one has a complete understanding of what genetic diversity  
96 means. The standard for such an understanding should of course be a complete and  
97 coherent account of all known puzzles related to genetic diversity.

98 The unusually admixed features of the Aboriginal Australians have yet to be  
99 explained by any model [1]. A list of morphological features aimed at defining modern

100 humans would exclude both modern Aboriginal Australians and Neanderthals, indicating  
101 some shared traits between the two [35]. Also unexplained is the origin of Negritos in  
102 South Asia. Despite the obvious phenotypic similarities and close Y and mtDNA  
103 relationships, no special autosomal relationship has yet been found between Negritos  
104 and African pygmies or even among different Negrito groups in South Asia [36].

105 In recent years, a more complete molecular evolutionary theory, the maximum  
106 genetic distance or diversity (MGD) hypothesis, has been making steady progress in  
107 solving both evolutionary and contemporary biomedical problems [37-50]. The core  
108 concept of the MGD theory, maximum genetic diversity or distance no longer changing  
109 with time, is *a priori* expected and supported by numerous facts [37, 51, 52]. In contrast,  
110 the neutral theory and its infinite site model fail to take MGD into account and tacitly  
111 assume that nearly all observed genetic distances or diversities could still increase with  
112 time with no limit defined [53, 54]. The MGD theory has solved the two major puzzles of  
113 genetic diversity, the genetic equidistance phenomenon and the much narrower range of  
114 genetic diversity relative to the large variation in population size [30, 37]. The primary  
115 determinant of genetic diversity (or more precisely MGD) is species physiology [37, 55].  
116 The genetic equidistance result of Margoliash in 1963 is in fact the first and best evidence  
117 for MGD rather than linear distance as mis-interpreted by the molecular clock and in turn  
118 the neutral theory [37, 39, 44, 45, 56-58]. Two contrasting patterns of the equidistance  
119 result have now been recognized, the maximum and the linear [45, 57]. The neutral  
120 theory explains only the linear pattern, which however represents only a minority of any  
121 genome today. The link between traits/diseases and the amount of SNPs shows an  
122 optimum genetic diversity level maintained by selection, thereby providing direct  
123 experimental disproof for the neutral assumption for common SNPs [38, 40, 46-48, 50, 59].

124 More direct functional data invalidating the neutral assumption have also been found [60,  
125 61].

126 One simple method to determine whether any DNA fragment has reached MGD is to  
127 count the number of overlap sites (coincident substitutions) in a sequence alignment of  
128 three different species [44]. Such sites represent positions where mutations leading to  
129 different residues had occurred independently at the same position in at least two species,  
130 which would be a low probability event under the neutral theory or its infinite site  
131 assumption but common under the MGD theory [44]. The neutral theory is only valid for  
132 slow evolving genes yet to reach MGD, where its infinite site assumption holds and the  
133 number of overlap sites follows calculation from probability theory [44]. Unfortunately,  
134 however, nearly all existing phylogenetic results are from fast evolving sequences that  
135 were *assumed* to follow the infinite site model when they in fact do not as they have now  
136 been shown to be enriched with overlap sites [44].

137 Coincident substitutions at overlap sites do not contribute to genetic distances and  
138 make the relationship between distance and time hard if not impossible to model  
139 accurately. To overcome this, we have developed the “slow clock” method that only uses  
140 slow evolving DNAs with zero or few overlap sites. Contrary to naïve expectations based  
141 on the neutral theory, fixed and standing variations in slow evolving proteins are in fact  
142 enriched with conservative amino acid substitutions and hence more neutral and suitable  
143 for phylogenetic inferences [62]. The method has produced a separation time for the  
144 pongids and humans that is remarkably consistent with common sense and the original  
145 interpretation of fossil records and drastically different from the result of fast evolving  
146 DNAs [45]. Here we used the MGD theory and its related methods to revisit the evolution  
147 of modern humans. The unique value of the MGD theory in human origin studies is that it  
148 helps select the truly informative sequences that would follow the neutral theory. Once

149 such sequences are selected, the remaining methodologies would be mostly covered by  
150 the neutral theory, and we fully grant the neutral theory to be valid for truly neutral  
151 sequences still at the linear phase of accumulating variations. We just disagree with its  
152 treatments of most genome sequences to be neutral and at the linear or near linear  
153 phase of accumulating genetic diversity.

154

## 155 **Methods**

156 **Sequence download.** We downloaded ancient and modern human genome sequences  
157 using publically available accession numbers. South Asian and Oceanian SNPs data  
158 from Pugach et al (2013) were obtained from the authors [63]. The Hunan and Fujian  
159 identity information of CHS sample of 1KG were obtained from the Coriell Institute  
160 website.

161

162 **Selection of SNPs.** *Random selection of 255K SNPs as fast evolving SNPs.* We  
163 selected 255K SNPs from 1KG data to represent the average variation of the genome  
164 (Supplementary Table S1). We first generated a random number for each SNP on a given  
165 chromosome followed by sorting the SNPs based on the random numbers, and then  
166 selected the top ranked set of SNPs with the number of SNPs in the set proportional to  
167 the size of the chromosome. SNPs from the slow set were removed. No consideration for  
168 SNP frequency was applied. We used the downloaded VCF files of 1KG to generate the  
169 genotyping data.

170

171 **Slow evolving SNPs.** The identification of slow evolving proteins and their associated  
172 SNPs were as previously described [59]. Briefly, to obtain non-synonymous SNPs

173 located in the slowest evolving genes, we collected the whole genome protein data of  
174 *Homo sapiens* (version 36.3) and *Macaca mulatta* (version 1) from the NCBI ftp site and  
175 then compared the human protein to the monkey protein using local BLASTP program at  
176 a cut-off of 1E-10. We only retained one human protein with multiple isoforms and chose  
177 the monkey protein with the most significant E-value as the orthologous counterpart of  
178 each human protein. The aligned proteins were ranked by percentage identities. Proteins  
179 that show the highest identity between human and monkey were considered the slowest  
180 evolving (including 423 genes > 304 amino acid in length with 100% identity and 178  
181 genes > 1102 amino acid in length with 99% identity between monkey and human). We  
182 downloaded the 1KG phase 3 data and assigned SNP categories using ANNOVAR. We  
183 then picked out the nonsyn SNPs located in the slow evolving set of genes from the  
184 downloaded VCF files of 1KG (Supplementary Table S2).

185

186 **Calling SNPs from genome sequences.** We used publically available software  
187 SAMTOOLS, GATK, and VCFTOOLS to call SNPs from either downloaded BAM files or  
188 BAM files we generated based on downloaded fastq data [64-66].

189

190 **Analysis of shared and unique SNPs.** Shared and unique SNPs were identified by  
191 using downloaded allele frequency information from 1KG. Classification of SNPs into  
192 different categories such as intergenic, intron etc were also according to downloaded  
193 VCF files of 1KG. For some studies, we also calculated the alternative allele frequency of  
194 a SNP in a randomly divided human group by using the PLINK software [67].

195

196 **Imputation.** Because commonly used SNPs chips for genome wide genotyping have  
197 only a fraction of the slow SNPs defined here, we performed imputation to obtain more



198 coverage of the slow SNPs on the South Asian and Oceanian datasets of Pugach et al  
199 (2013). We used the SHAPEIT2 software to do phasing for the SNP chip data [68] and  
200 the IMPUTE2 software to impute based on 1KG data [69].

201

202 **Genetic distance calculation.** We used the custom software, dist, to calculate pairwise  
203 genetic distance (PGD) or number of SNP mismatches from SNP data [59]. This software  
204 is freely available at <https://github.com/health1987/dist> and has been described in detail  
205 in previous publications [41, 70]. We obtained PGD for each of the 25 human groups in  
206 the 1KG data and obtained average PGD per group for groups within each of the 5 major  
207 continents as represented by the 1KG. We excluded highly admixed groups ASW, ACB,  
208 CLM, and PUR in calculating the continental average.

209

210 **Principal component analysis (PCA).** PCA is commonly used to discover genetic  
211 structures of a population. We utilized GCTA to analyze data in the PLINK binary PED  
212 format to generate two files (\*.eigenvec and \*.eigenva). We drew PCA plot using  
213 \*.eigenvec file [67, 71]. One sample BEB\_HG04131 was found on PC2-PC3 plot to be an  
214 outlier and was hence excluded from the PC analysis and most distance calculations  
215 presented here.

216

217 **Other methods.** Other common statistical methods used were Student's t test, chi  
218 square test, and Fisher's exact test, 2 tailed.

219

## 220 **Results**

### 221 **Contrast between fast and slow evolving DNAs in genetic diversity patterns**

222 Different human groups are well known to share ~85% of common genetic variations [72].  
223 However, sharing may not necessarily mean genetic exchanges or common ancestry as  
224 assumed by the field as saturation or parallel mutations could also explain it. These two  
225 explanations could be distinguished by asking whether the fractions of shared SNPs are  
226 similarly distributed in the fast versus the slow evolving sequences. Since the majority of  
227 human genomes are made of non-coding sequences and hence faster evolving relatively  
228 to coding sequences, we randomly selected from the 1000 genomes project phase 3  
229 (1KG) data a set of 255K SNPs to represent the fast evolving SNPs or the average  
230 genome wide variation (Supplementary Table S1) [73]. To find the slow evolving SNPs,  
231 we first identified the slow evolving proteins by aligning human and Macaca proteomes  
232 and then selected only the non-synonymous (nonsyn) SNPs located in these proteins as  
233 previously described [59]. Proteins that show the highest identity between human and  
234 monkey were considered the slowest evolving, including 423 genes > 304 amino acid in  
235 length with 100% identity and 178 genes > 1102 amino acid in length with 99% identity  
236 between monkey and human. We downloaded 1KG data and obtained a list of ~15K  
237 nonsyn SNPs located in these slow evolving proteins as our slow set of SNPs  
238 (Supplementary Table S2 and S3).

239 To test the amount of sharing, we examined the SNP frequency files from 1KG. For  
240 the three human groups, African (AFR), East Asian (ASN), and European (EUR), we  
241 considered a SNP as shared if it has frequency > 0 in more than one group and unique if  
242 it is present in only one group. We examined 3 different sets of SNPs, the slow set as  
243 defined above, syn SNPs in the slow genes as defined above (Supplementary Table S3),  
244 and the random set as defined above. The results showed a clear pattern of more sharing

245 in fast evolving SNPs (Table 1), indicating saturation level of genetic diversity, which  
246 further confirmed previous findings of higher genetic diversity in patients of complex  
247 diseases relative to normal matched controls [40, 48, 59]. That the observed sharing (24%)  
248 in fast SNPs was lower than the 85% for common SNPs was because we did not filter the  
249 SNPs by frequency and hence there were many private or low frequency SNPs in our set.

250 As fast evolving SNPs are enriched with common SNPs, which may in part explain  
251 more sharing as found above, we next studied only rare SNPs with the same allele  
252 frequency in a racial group for either fast or slow evolving variants. For each major racial  
253 group, we selected a set of SNPs that have the alternative allele appearing only twice in  
254 the group (either two heterozygous or one homozygous), as singleton SNPs may be  
255 sequencing errors and more common SNPs may be too few for informative studies. We  
256 divided the set into several subsets based on evolutionary rates, intergenic, intron,  
257 synonymus or missense changes in fast or slow evolving proteins with SNP numbers of a  
258 racial group in each subset ranging 281-1376757. Fast evolving proteins here include all  
259 those that do not belong to the slow group as defined above. We then examined the  
260 fractions of these SNPs that were present in other racial groups. The results showed  
261 higher shared fractions for SNPs in fast evolving DNAs except for sharing between AMR  
262 (American) and EUR (Fig. 1). As AMR is well known to be highly admixed with Europeans,  
263 the observed equal sharing in EUR of SNPs regardless of evolutionary rates in fact made  
264 sense and validated our approach. We further validated it by randomly dividing the EAS  
265 group into two subgroups EAS1 and EAS2. From the random 255K fast SNPs and the  
266 slow SNP set, we selected SNPs that appeared in EAS1 only twice and examined their  
267 sharing in EAS2 and other racial groups. The results showed equal sharing of fast and  
268 slow evolving SNPs in EAS2 but more sharing of fast evolving SNPs in other racial  
269 groups (Fig. 1F). Thus, these results invalidated the present notion of a very recent

270 common ancestor (<100 ky) and large amount of admixture as suggested by the Out of  
271 Africa model and support a more distant common ancestor and limited admixture as  
272 advocated by the multiregional model.

273 We next examined the genetic diversity levels within each of the 5 major human  
274 groups as sampled by 1KG, AFR, AMR (American), ASN, EUR, and SAS (South Asians),  
275 by calculating the average pairwise genetic distance (PGD) per group in different types of  
276 SNPs, including the slow set and the random set as defined above, and a stop codon  
277 gain/loss set (Fig. 2). In our analysis here, we have excluded 4 highly admixed groups,  
278 Americans of African Ancestry in SW USA (ASW), African Caribbeans in Barbados (ACB),  
279 Colombians from Medellin Colombia (CLM), and Puerto Ricans from Puerto Rico (PUR).  
280 Since certain deleterious SNPs may exist only in heterozygous (het) state rather than  
281 homozygous (hom) state, we calculated, in addition to total PGD contributed by both het  
282 and hom differences, also the hom PGD resulting from hom mismatches that should  
283 better represent neutral diversity. As shown in Fig. 2, hom PGD showed different pattern  
284 from total PGD only in the slow SNPs, with the hom PGD level of AFR below the average  
285 of five groups while that of AMR being the highest. Remarkably, the stop codon set  
286 showed similar pattern as the random set, with AFR having the largest PGD. This  
287 indicates functionality rather than neutrality for the random set since stop codon SNPs  
288 are definitely functional given its dramatic effect on protein structure [61] and since a  
289 neutral set is expected to be very different from the stop codon set. To verify the results of  
290 stop codon SNPs, we also found similar PGD pattern in a set of splicing site gain/loss  
291 SNPs that are also expected to be functional (Supplementary Information S1 and Fig.  
292 S1A-B). Overall, these results showed Europeans with the lowest diversity in stop codon  
293 and splicing SNPs and East Asians with the lowest diversity in the random set ( $P < 0.01$ ).  
294 Africans have the highest genetic diversity levels in all types of non-neutral SNPs

295 examined as well as the random set ( $P < 0.01$ ), thereby deeming the Out of Africa model  
296 untenable as it is based on the now disapproved assumption of neutrality for a random  
297 set of genome wide SNPs.

298 To confirm if we have made the appropriate cut-off in selecting the slow SNPs as our  
299 phylogeny-informative set of neutral SNPs, we verified that the next set of just slightly  
300 less conserved nonsyn SNPs (total number ~13.7K, Supplementary Table S4) within 361  
301 autosomal proteins already behaved like the random set or the stop codon set (800-1102  
302 aa in length with identity between human and monkey  $>99\%$  but  $<100\%$ ) (Supplementary  
303 Information S1, Fig. S1 C-D). Furthermore, syn SNPs within the slow set of proteins as  
304 defined above (Supplementary Table S3) gave PGD patterns similar to the stop codon  
305 SNPs but unlike the nonsyn SNPs within the same set of proteins (Supplementary  
306 Information S1, Fig. S1 E-F). Finally, we confirmed that these slow evolving proteins still  
307 have neutral nonsyn variations that are not under natural selection by showing that these  
308 proteins have fewer overlap or recurrent mutation sites than relatively faster evolving  
309 proteins (Supplementary Information S2 and Table S5), and that known positively  
310 selected genes are faster evolving (Supplementary Information S3). Together, these  
311 results suggest that only hom distance calculated from the slow nonsyn SNPs, hereafter  
312 referred as the slow SNPs, can be informative to phylogenetic inferences. To view slow  
313 nonsyn SNPs as neutral seems counter to expectations based on the neutral theory but  
314 in fact makes sense under the MGD perspective as fast SNPs are at saturation levels that  
315 are maintained by selection and play adaptive roles in response to fast changing  
316 environments [62].

317 Using hom distance measured by slow SNPs, we found, as expected, Africans as the  
318 outgroup to the other 4 groups as sampled in 1KG because the non-African groups are  
319 closer to each other than to Africans (Supplementary Fig. S2A). Also as expected from a

320 *priori* reasoning but not from the existing model, Africans are closer to each other than to  
321 non-Africans. However, for the random set of 255K SNPs, total distance within Africans  
322 was similar to that between Africans and non-Africans, which is well known from previous  
323 studies and reflects saturation as we now realized from the MGD theory (Supplementary  
324 Fig. S2B). This result also established the maximum genetic equidistance phenomenon,  
325 previously known only at the inter-species level, at the intra-species level where groups  
326 with lower MGD are equidistant to the group with the highest MGD with the distance  
327 being equal to the MGD of the highest MGD group. The result independently confirms the  
328 difference between slow and fast SNPs and the fact that fast SNPs are at saturation level  
329 of genetic diversity.

330 We also reexamined the claim of an inverse correlation between intra-population  
331 genetic diversity and distance to Africa, purporting to support the Out of Africa model  
332 [74-76]. Clearly, such correlation was not observed for the slow SNPs where Americans  
333 have the highest diversity among all groups (Fig. 2). Neither was it found for the 255K fast  
334 SNPs where Americans were more diverse or have higher PGD and higher numbers of  
335 het alleles than East Asians; South Europeans (IBS and TSI) were more diverse than  
336 North Europeans (CEU and FIN); South Asians were more diverse than Europeans  
337 (Supplementary Fig. S3). Different selection pressures on the fast SNPs for different  
338 populations may explain these patterns. Ascertainment bias plus overlooking saturation  
339 may explain previous conclusions.

340

#### 341 **Divergence time between major human groups**

342 To estimate the time of separation between major human groups, we determined the  
343 mutation rate of the slow evolving genes. We found 34 informative genes in the 178 slow  
344 evolving genes as defined above that showed gap-less alignment in any pair of

345 comparisons among humans, chimpanzees, orangutans, and monkeys (Supplementary  
346 Table S6). Assuming gorilla and orangutan contributed similarly to their genetic distance  
347 since their split 12 myr as inferred from the fossil records [77], we obtained a gorilla or  
348 orangutan mutation rate of 0.000173 aa per myr per aa for the 34 genes (47628 aa).  
349 Given a distance of 0.00385 aa per aa between human and orangutan and their  
350 separation time of 17.6 myr [45], we used the formula  $0.00385 = R_{\text{human}} \times 17.6 + 0.000173$   
351  $\times 17.6$  to obtain the human mutation rate as 4.57E-5 aa per myr per aa, which is 3.88  
352 times slower than orangutan's. Given this mutation rate and the distance matrix (total  
353 distance including both het and hom distances) as shown in Table 2 (only the largest  
354 distance among groups are shown), we estimated the split time between ESN (Esen in  
355 Nigeria) and GBR (British in England and Scotland) as 1.92 myr, consistent with the  
356 known first migration out of Africa for the Homo species as shown by the fossil records.  
357 The split between ESN and CHS (Southern Han Chinese) was similar or slightly shorter  
358 at 1.86 myr and not significantly different from that between ESN and GBR. In fact, using  
359 hom distance as measured by the slow SNPs which represent neutral distance better,  
360 ESN is slightly closer to CHS (14.87) than to GBR (14.93). We only used the largest  
361 distance between groups, which was between ESN and GBR, to calculate the time in  
362 order to be more precise. Since admixture was common, shorter distances between  
363 some pairs of groups may be a result of gene flow and hence not reflect true separation  
364 time.

365

### 366 **Y chromosome phylogeny**

367 The existing Y phylogenetic tree depends on inferring derived alleles and in turn  
368 requires the validity of the infinite site assumption, which means no maximum genetic  
369 distance and no recurrent mutations. However, this assumption can be proven invalid

370 even just by the existing Y tree itself, since the tree shows numerous recurrent mutations  
371 that were simply ignored without valid reasons (Supplementary Table S7), especially for  
372 the early branches with some such as KxLT and HIJK contradicted by as many as 50% of  
373 all relevant SNPs [78]. That these self-contradictions mostly occurred for the early African  
374 branches such as BT and CT but rarely for the terminal Eurasian ones indicates the  
375 unrealistic nature of these early branches. Also, while haplotypes with few sequence  
376 variations from the ancestor of F, C, D, E, NO, KxLT, or K are routinely found in present  
377 day people, none could be found for these early branches. The branching pattern in  
378 Africans often involves one branch, such as A00, with few or no sub-branches while the  
379 other branch A0-T accounting for all of the remaining haplotypes on Earth, which is odd  
380 and against branching patterns known in experimental biology such as the embryonic  
381 differentiation into three layers with each layer giving rise to multiple cell types.

382       Given functionality for genome wide autosomal SNPs as discussed above, it is easily  
383 inferred that most SNPs in Y chr are also non-neutral. Evidence for extreme natural  
384 selection on Y is also known [79, 80]. We therefore redrew the Y tree based on shared  
385 alleles (rather than on derived alleles), which may mean common physiology more than  
386 common adaptations if physiology is the chief determinant of MGD. Using previously  
387 defined haplotypes for 1KG samples (Supplementary Table S8) and 58251 cleanly called  
388 SNPs (no individual with uncalled SNPs, Supplementary Table S9) [81], we found a  
389 major megahaplogroup ABCDE (Fig. 3). Megahaplotype F, defined as lacking any  
390 mutations that define other haplotypes, is the ancestor. All F-like or F\* haplotypes  
391 sequenced so far are partial ABCDE carrying 4 (Lahu\_HGDP01320), 13  
392 (Malay\_SSM072), or 14 (KHV\_HG02040) of the 151 mutations that group ABCDE (Fig. 3)  
393 [81-83]. The F\* haplotype is most common in East Asia, present in 5 of 7 (71.4%) Lahu  
394 males in Yunnan of South West China [84], 10-15% of Han and other minority Chinese,



395 and low percentages (<10%) in South Asians and French. Furthermore, the top 4  
396 individuals among 1KG closest to the ~45 ky old Western Siberian Ust'-Ishim who carried  
397 NO haplotype and was expected to be most like the AMH ancestor were all East Asians  
398 with Asian haplotypes F and O (F2 in KHV\_HG02040, O2 in CHB\_NA18534, O3 in  
399 CHS\_HG00559, O3 in KHV\_HG02088), indicating least deviation from the ancestor for  
400 Asian haplotypes [14]. Those three O type East Asian individuals also were the closest to  
401 the three F\* carrying individuals above. These results suggest the origin of F in East Asia  
402 with subsequent migration to other regions of the world (Supplementary Fig. S4).

403 In our tree, alleles previously used to define BT and CT now merely represent alleles  
404 associated with the original F ancestor. The AB grouping in our case makes more sense  
405 with phenotypes than the BT grouping since it groups African B with African A rather than  
406 with the CT group containing mostly Eurasians. The key feature of our tree is that every  
407 haplotype besides the original F is associated with haplotype specific SNPs and there are  
408 no inconsistent SNPs. Such self-consistency alone would qualify it as more correct than  
409 the self-inconsistent tree rooted in Africa.

410 A real haplotype should exist in a way that has only its own haplotype specific SNPs  
411 plus private SNPs. While it is more likely to be the case for terminal haplotypes, it is not  
412 impossible for ancestral haplotypes close to the root of the tree, which could be used to  
413 distinguish two different competing classifications on an ancestral haplotype. One of the  
414 major differences between our Out of Asia tree and the Out of Africa tree is the position of  
415 haplotype C, which belongs to ABCDE in the former and CT in the latter. The ABCDE  
416 haplotype is closer to the root in the Asia tree (among the first to branch out from the root)  
417 than CT is in the Africa tree (2<sup>nd</sup> to branch out from the root). Hence, relative to ABCDE,  
418 CT should have a higher chance to be like a more terminal haplotype. The number of CT  
419 defining SNPs is larger than ABCDE (264 vs 151, with additional 50 SNPs contradicting

420 CT), which should also make CT more like a terminal branch. In reality, however, one  
421 found the exact opposite. People with only ABCDE specific SNPs plus private SNPs have  
422 been found as in present day people Lahu\_HGDP01320, Malay\_SSM072, and  
423 KHV\_HG02040 (Fig. 3). That these Y chr had only a portion of ABCDE defining SNPs is  
424 consistent with the dynamics of the ancient appearance of ABCDE. Also consistent with  
425 the ancestral status of ABCDE, the 38.7 ky old Kostenki14 had 83 among 84 informative  
426 SNPs supporting it as ABCDE and 88/92 as C, and the 30.6 ky Vestonice43 had 19/20 as  
427 ABCDE and 20/22 as C [85, 86]. In contrast, no one with only CT specific alleles plus  
428 private SNPs has been found to exist today or in the past. All ancient Europeans known  
429 to be CT and lacking alleles for downstream haplotypes were in fact missing informative  
430 sites for at least some haplotypes due to incomplete coverage in sequencing [85, 86].  
431 These findings strongly support grouping C in ABCDE rather than in CT, thereby  
432 invalidating the Out of Africa tree.

433

#### 434 **mtDNA phylogeny**

435 The existing mtDNA phylogenetic tree has exactly the same problems as the existing  
436 Y tree as discussed above. mtDNA has also been found to be under strong selection  
437 relative to more slowly evolving nuclear DNAs, consistent with the MGD theory [34, 87,  
438 88]. Based on previously defined mtDNA haplotypes for 1KG (Supplementary Table  
439 S8)[81], we redrew the mtDNA tree using slow evolving SNPs, which alter amino acids or  
440 RNA sequences (Fig. 4A, Supplementary Information S4, Supplementary Fig. S5,  
441 Supplementary Table S10). Fast SNPs are more involved in adaptation to fast changing  
442 environments and should not be used whenever possible. Two lines of evidence suggest  
443 haplogroup R as the ancestor of all modern haplogroups. First, ancient humans are  
444 expected to be closer to the ancestor and the oldest AMH, Ust'-Ishim, carried the R\*

445 haplotype [14]. Second, R0 is the least differentiated haplotype and closest to the ancient  
446 haplotype in Ust'-Ishim (Fig. 4B). That R0 is most common in Chinese among 1KG  
447 samples indicates origin of R in East Asia (Fig. 4B) and subsequent diversification in  
448 other regions of the world (Supplementary Fig. S6).

449 Unlike Y, mtDNA diversification as defined by slow SNPs here is far more star like  
450 with multiple parallel haplotypes and few hierarchical structures (Fig. 4A, Supplementary  
451 Fig. S5), which is expected from the vast difference in the possible number of offspring  
452 between males and females. Many female individuals with R0 might each serve as an  
453 ancestor of a specific haplotype within R or N haplogroup, and R is not a sub-branch of N.  
454 M also directly derived from R0. L and numerous M subtypes shared a few defining  
455 SNPs.

456 To confirm M giving rise to L, we examined mtDNA distance between African (YRI:  
457 Yoruba in Ibadan, Nigeria) L and South Asian (BEB: Bengali from Bangladesh) M and  
458 found L3e to be the closest to M (Fig. 4C). Also, M of BEB or GIH is closer to L3e than M  
459 of CHS, indicating a more direct role for BEB or GIH in dispersing AMH mtDNA into Africa  
460 and a Southern route into Africa. Consistently, in autosome distance, BEB or GIH with M  
461 haplotype were closer to Africans than those with N (including R) haplotype (Fig. 4D),  
462 despite the fact that people with M had larger autosomal nucleotide diversity than those  
463 with N (PGD: M\_BEB = 8.59, N\_BEB = 7.9, M\_GIH = 8.42, N\_GIH = 8.36). M may be  
464 closer to the common ancestor of M and L since all L types except L3 are at least 2 fixed  
465 slow SNPs (769, 1018) away from the common ancestor. There might be a time when  
466 there were multiple M types with no L, and then one of the M types with mutations in 769  
467 and 1018 sites became the common ancestor of all L types except L3.

468

469 **Neanderthals and Denisovans**

470 If major human groups have separated ~2 myr ago with region specific features  
471 developed not long after separation such as shovel shaped teeth in *H. erectus* from  
472 China (Yuanmou man and Peking man), Neanderthals and Denisovans with features  
473 more modern than *H. erectus* should be expected to belong to one of the modern groups  
474 today. However, previous studies have found Neanderthals to be outgroup to AMH and  
475 used D-statistics to show Neanderthal gene flow into non-Africans but oddly not Africans  
476 [11, 12]. The assumption of D-statistics is that all modern groups are equidistant to  
477 chimpanzees so that presence of derived alleles (different from chimpanzees) was due to  
478 gene flow from Neanderthal. If in fact Africans are closer to chimpanzees or carrying  
479 more ancestral alleles in general due to perhaps common adaptation to the Africa  
480 environment, the conclusion of gene flow into non-Africans would become invalid. We  
481 examined this by measuring genetic distance between 1KG and 10 previously sequenced  
482 chimpanzee genomes [89]. Using the random 255K SNPs set, we found closer hom  
483 distance between Africans and chimpanzees than between non-Africans and  
484 chimpanzees (Supplementary Fig. S7). As presence of Neanderthal derived alleles in a  
485 non-African are mostly in het state [14], which could be observed to be biased toward  
486 non-Africans only if Africans are in hom ancestral state, the fact of more hom ancestral  
487 alleles in Africans therefore deems invalid the previous finding of Neanderthal gene flow  
488 into non-Africans. Furthermore, as already noted above for Y and mtDNA trees, the  
489 finding of saturated level of genetic diversity makes the infinite site assumption invalid,  
490 which in turn makes the assignment of ancestral and derived alleles unrealistic. That the  
491 D statistics method may not be appropriate to detect Neanderthal introgression has also  
492 been independently found by others [90]. Thus, the relationship between  
493 Neanderthals/Denisovans and present day populations remains to be determined.

494 Making use of the published Neanderthal and Denisovan genomes [11, 12, 91], we  
495 calculated the genetic distance in slow SNPs between 1KG and Neanderthals (Altai,  
496 Vindija 33.16, 33.25, 33.26, and Mezmaiskaya1) or Denisovan3 (Fig. 5A). These ancient  
497 genomes showed closer distance to Africans except Vi33.25 to ASN and Vi33.26 to AMR.  
498 Denisovan3 was closer to Africans than Neanderthals were (Fig. 5A). In contrast to the  
499 Neanderthals and Denisovan3, their near contemporary AMH Ust'-Ishim from Western  
500 Siberia was closest to SAS (Fig. 5A) and grouped with SAS in PCA plots (4B-G). We also  
501 studied the more recently reported Neanderthal genomes of Vi33.19, Vi87, Les Z4,  
502 GoyetQ56, and Mezmaiskaya2 [6, 92] and found them to be also closest to AFR except  
503 Vi87 who was equally related to AFR and SAS (Supplementary Fig. S8). Using the slow  
504 SNPs but not the non-informative SNPs, we also found that two Neanderthals from the  
505 same location, Mezmaiskaya 1 and 2, but separated for ~20 ky were in fact closest to  
506 each other than either was to any other Neanderthals or ancient DNAs of modern  
507 humans found anywhere in the world (Supplementary Fig. S9), thus confirming regional  
508 continuity and invalidating the previous conclusion of Neanderthal population turnovers [6,  
509 92]. These results suggest that Neanderthals and Denisovans were Africans who  
510 migrated into Eurasia and admixed with local non-Africans. The observations of an East  
511 Asian like Neanderthal (Vi33.25) in Europe at >45,000 years ago and of a South Asian  
512 like Western Siberian (Ust'-Ishim) from ~45,000 years ago indicates migration of Asians  
513 into Europe around the time of AMH origin in South East Asia.

514

### 515 **Origins of Negritos and Aboriginal Australians**

516 The Andamanese and the African pygmies seem obviously related in multiple  
517 aspects, including traits, Y relationship with the African megahaplogroup ABDE, and  
518 mtDNA haplotype M being closely related to African L. However, previous studies have

519 found Andamanese to be even more genetically distant to Africans than other Eurasians  
520 [36]. Using the published genomes of 10 individuals from the Jarawa (JAR) and Onge  
521 (ONG) populations in the Andaman Islands [36], we found that Andamanese are  
522 relatively closer to Africans or have lower AFR/SAS(-BEB) distance ratio than other  
523 nearby populations such as BEB, with ONG more so than JAR, consistent with the known  
524 less admixture in ONG relative to JAR (Fig. 6A). PCA plots also showed Andamanese  
525 closer to Africans than all five populations of SAS (Fig. 6B). Relative to the distance to  
526 SAS, ONG showed smaller distance to Mbuti than to San or other Africans examined  
527 except LWK (Fig. 6C). The Mbuti group here consists of 4 published genomes from the  
528 Simons project [82] and the San group consists of 2 published genomes [93]. Given that  
529 Andamanese were closer to Africans than other Indians were (Fig. 6A) but Mbuti pygmies  
530 were not closer to Andamanese than some other Africans were, it can be inferred that  
531 Andamanese came from Mbuti rather than the opposite.

532 The African affinity of Neanderthals prompted us to examine the distance between  
533 Neanderthals (with relatively higher coverage genomes, Vi33.16 and Altai) and several  
534 different Indian populations (ONG, JAR, BEB, and GIH) to see if ONG might have come  
535 from Neanderthals or related humans. Relative to the distance to the ~4500 year old  
536 African Mota [94], ONG was closer to Neanderthals Vi33.16 and Altai, as well as to  
537 Ust'-Ishim who was known to have large amount of Neanderthal admixture, than other  
538 Indians were (Fig. 6D). Also, if Andamanese came from Neanderthals, Neanderthals  
539 should be closer to Mbuti than to San and other Africans, since Andamanese are closer  
540 to Mbuti than to San (Fig. 6C). This was indeed the case for the Altai individual who had  
541 high coverage genome for this analysis to be informative (Fig. 6E).

542 Since different Negrito groups in South Asia share similar traits, one expects them to  
543 be genetically related. The new Y tree grouping C with ABDE further suggests a common

544 ancestry for different Negrito groups since the C haplotype is common in certain Negrito  
545 groups in Philippines while D is common in some others such as Onge. We therefore  
546 made use of a previously published SNPs genotyping data for a number of Oceanian  
547 groups including the Negrito group Mamanwa and its neighboring group Manobo in  
548 Philippines [63]. We measured the ONG/JAR distance ratio to look for the group that is  
549 closest to ONG relative to its neighbor JAR and the Mamanwa/Manobo distance ratio to  
550 look for the group closest to Mamanwa relative to its neighbor Manobo. Of the 13 groups  
551 examined, Mamanwa showed the smallest ONG/JAR distance ratio besides ONG;  
552 conversely, ONG showed the smallest Mamanwa/Manobo distance ratio besides  
553 Mamanwa (Supplementary Fig. S10). These results suggest that the two Negrito groups  
554 are more closely related to each other than either is to other groups as examined here.

555 We also examined the Aboriginal Australian (AUA) samples in the Pugach et al  
556 (2013) dataset and a previously published ~100 year old AUA (AUA\_100yr) who was  
557 unlikely to have admixed with European colonizers [95]. These AUA samples showed  
558 lower Mamanwa/Manobo ratio than other Oceanians (Supplementary Fig. S11). The AUA  
559 samples from Pugach et al (2013) also showed lower AFR/ASN ratio than other  
560 Oceanians, representing 68% of the average ratio for the Oceanians (excluding AUA and  
561 NGH or New Guinea Highlanders). To examine if the African component of AUA had  
562 come from Neanderthals, we calculated the Altai/ASN distance ratio of AUA and found it  
563 to be 64% of the average ratio for the Oceanians in Pugach et al (2013) dataset, which  
564 was significantly lower than the 68% found for AFR/ASN ratio, indicating closer  
565 relationship of AUA to Altai than to AFR. These results showed similarity between AUA  
566 and Negritos, indicating similar ancestry in Neanderthals and Denisovans.

567

568 **Testing the out of East Asia model**



569 We next tested certain obvious predictions of the out of East Asia model. First, the  
570 model predicts lower diversity in people directly associated with the original AMH and  
571 higher diversity in people resulting from admixture of AMH with archaic humans. We  
572 calculated the hom PGD in slow SNPs as well as het numbers for each of the 25 groups  
573 totaling 2534 individuals in 1KG. The lowest hom PGD level was found in LWK followed  
574 by slightly higher level in CHS (Supplementary Fig. S12A). However, LWK has  
575 significantly higher numbers of het than CHS (Supplementary Fig. S12B). As high level  
576 heterozygosity indicates high genetic diversity and would reduce hom distance, it is likely  
577 that CHS has lower genetic diversity than LWK. We further found that within CHS (made  
578 of 72 individuals from Hunan and 36 from Fujian), Hunan samples have lower hom PGD  
579 and het numbers than Fujian samples (Supplementary Fig. S12CD). These results  
580 indicate that CHS, in particular Hunan people, have lowest genetic diversity levels among  
581 the 25 groups in 1KG. Given that known admixed groups such as MXL and PUR showed  
582 the highest genetic diversity or PGD (Supplementary Fig. S12A), it may be inferred that  
583 CHS or Hunan people may have the least amount of admixture and hence represent the  
584 original AMH group, at least among the 25 groups sampled here. That Africans, as  
585 human ancestor from ~2 myr ago according to the multiregional model, did not show the  
586 highest genetic diversity level may seem unexpected but is in fact consistent with a key  
587 role for admixtures as claimed by the multiregional model as well as our out of East Asia  
588 model here. The original AMH group should have low admixture with archaic people in  
589 order for evolution into AMH to be possible since admixture may reverse AMH back to the  
590 archaic state.

591 Second, we would expect Southern East Asian groups to be closer to Africans.  
592 Although CHS represent samples collected from Southern China (Hunan and Fujian),  
593 while CHB (Han Chinese in Beijing) samples were from Northern China (Beijing), both in



594 fact contain Southern and Northern Chinese. We therefore made use of the Hunan  
595 versus Fujian samples in CHS, where Fujian people are known to be mostly migrants  
596 from Central North China during the West Jin, Tang, and Song dynasties. We calculated  
597 the distance of each group to Hunan or Fujian and obtained the Hunan/Fujian distance  
598 ratio of each group. Consistently, groups known to have more Northern Chinese  
599 admixtures, such as CHB, MXL (Mexican Ancestry from Los Angeles), PEL (Peruvians  
600 from Lima), JPT (Japanese in Tokyo), had higher Hunan/Fujian distance ratio than  
601 Southern groups such as CDX (Chinese Dai in Xishuangbanna) and KHV (Kinh in Ho Chi  
602 Minh City, Vietnam) (Fig. 7A). Of note, FIN is closest to Hunan people among EUR  
603 groups ( $P < 0.01$ ), suggesting that North Western migrations of Southern Chinese during  
604 the first wave of AMH dispersal from Hunan area may have contributed to the ancestry of  
605 FIN. Consistently, Western hunter-gatherers from the Paleolithic age also showed closer  
606 distance to Hunan (manuscript in preparation). All AFR groups showed lower  
607 Hunan/Fujian distance ratio than non-Africans with LWK in East Africa the lowest,  
608 consistent with migration of Southern Chinese into Africa and into the Horn of Africa first.  
609 That non-Africans had more Fujian admixtures is consistent with known migrations of  
610 Northern East Asians into both the West and the America in more recent times during the  
611 Neolithic and Bronze ages. We further found Hunan people to be relatively closer to  
612 Africans than other South East Asians such as CDX and KHV (Fig. 7B), indicating origin  
613 of AMH more likely in Hunan relative to other nearby regions.

614 Third, as migration of AMH from Hunan via the Southern route to East Africa must  
615 cross the Indian subcontinent, one would expect closer relationship with Africans for  
616 groups within South Asia that are more related to Chinese relative to those more related  
617 to Europeans or more Southern relative to more Northern. Indeed, relative to Fujian  
618 people, the distance of different Indian groups to Africans follows exactly their direct

619 distance to Hunan people, as well as their direct distance to LWK, in the order of  
620 increasing distance, BEB, GIH, ITU, STU, and P JL (Fig. 7BC). Also, Gujarati Indians  
621 (GIH) in Western India is closer to Africans than Punjabi people from Northern Pakistan  
622 (P JL) (Fig. 7B). Consistently, relative to P JL, both BEB and GIH are closer to Africans  
623 with BEB closer than GIH (Fig. 7B). The observation of lower BEB/Fujian distance ratio  
624 than Hunan/Fujian is consistent with Indians being in general closer to Africans than East  
625 Asians (Fig. 7D) and being more recent ancestors to Africans than East Asians based on  
626 the migration route of the out of East Asia model.

627 Fourth, we hypothesized that the branching process of Y may involve AMH  
628 hybridization with archaic humans and subsequent adaptive co-evolution of Y and  
629 admixed autosomes. As the first major split resulted in ABCDE, G, and HIJK haplogroups,  
630 we tested whether the ABCDE megahaplogroup, whose sub-branches are mostly found  
631 in Africans and South Asians or Oceanians with African like features, may have resulted  
632 from admixture of F AMH with admixed archaic Africans such as Neanderthals who may  
633 have migrated to South East Asia. We examined the Y chr sequences of three  
634 Neanderthals [6, 7], and found all to share alleles at informative sites with haplotype A0, A,  
635 AB and ABCDE but not with any non-ABCDE haplotypes (Table 3). These results further  
636 confirmed the African affinity of Neanderthals as shown by autosome analyses above and  
637 indicated that admixture of F AMH with Neanderthals may have resulted in African-like  
638 descendants with ABCDE megahaplotype who largely preferred to live in the Southern  
639 hemisphere. Consistently, East Asians (JPT) with D or C haplotype showed closer  
640 autosomal distance to Andamanese (also with D haplotype) or African MSL (with E  
641 haplotype) than those with O haplotype did (Supplementary Fig. S13).

642 Fifth, to similarly test whether mtDNA diversification from the original ancestor type to  
643 more African type may involve AMH hybridization with archaic humans, we examined the  
644

645 distance between archaic and modern mtDNAs in slow SNPs (Supplementary Table S10).  
646 Although archaic mtDNAs were nearly equidistant as measured by mtDNA genome wide  
647 SNPs to the modern group consisting of Europeans (CEU: Utah Residents with Northern  
648 and Western European Ancestry), East Asians (CHS), and Africans (LWK: Luhya in  
649 Webuye, Kenya), they were closer to Africans in SNPs found in archaic humans (sites  
650 that differ between archaic mtDNA and the rCRS), indicating more sharing of archaic  
651 alleles in Africans (Supplementary Fig. S14). This is likely due to independent adaptive  
652 mutations since archaic mtDNAs are outgroups to modern mtDNAs as previous studies  
653 have shown. We also confirmed it by showing that the average distance between archaic  
654 and modern mtDNAs were larger than that within modern mtDNAs (Supplementary Fig.  
655 S15A). The archaic mtDNAs are at least of two types, with Neanderthal Vi33.16 and Altai  
656 belonging to one type or being close to each other than to other archaic mtDNAs while  
657 Denisovan and Heidelbergensis [96] belonging to another type (Supplementary Fig.  
658 S15B). Such results support the notion of multiple turnover events in mtDNA types in the  
659 past ~2 myr of human evolution.

660 Our results here confirmed the first mtDNA tree ever built that placed the original  
661 AMH type (type 1 morph) in East Asia [29]. Our original type here is defined by the major  
662 alleles of 6 slow SNPs, 750, 1438, 2706, 8860, 14766, 15326 (Vi33.16 and Altai have all  
663 6 except 2706, Denisovan has 14766 and 15326, and Heidelbergensis has 14766 and  
664 1438). The earliest AMH Ust'-Ishim had the major alleles of these 6 SNPs and no  
665 additional slow SNPs. Mutation at 14766 defines V and VH and further mutation at 2706  
666 defines H (Supplementary Fig. S5A). All other haplotypes overwhelmingly carry the major  
667 alleles of these 6 sites plus a few additional less common slow SNPs. We calculated the  
668 number of slow SNPs in each haplotype present in the 1KG and found R0 of Chinese to

669 have the least amount among all non VH haplotypes, supporting R0 as the original type  
670 (Supplementary Fig. S16 and Table S11).

671 We examined whether the amount of allele sharing with archaic mtDNAs supports  
672 the above results linking archaic humans with South Asians or Oceanians. Using  
673 PhyloTree17 and Mitoweb data, we identified all non-L haplotypes that share alleles with  
674 archaic mtDNAs and calculated the number of shared alleles in each haplotype  
675 (Supplementary Table S12, Supplementary Information S4). Among R and N haplotypes,  
676 P4b1, R7a, J1b, and W3 were the most enriched with archaic alleles (4 alleles), which are  
677 common in Oceanians or Arabians/Caucasians/South Asians. Among M haplotypes  
678 (excluding L), G4, M17a, M27a, M76a, and M7b1a2a1a were the most enriched with  
679 archaic alleles (5 alleles), which are common in native Japanese, South East Asians,  
680 Papuans, and Indians. The M haplotype with the least amount of archaic alleles is D5 (1  
681 allele), which is most common in Chinese.

682 We next calculated the distance of each modern haplotype in 1KG to archaic  
683 mtDNAs as measured by either slow or fast SNPs found in archaic genomes, and  
684 assigned each a distance ranking (Supplementary Fig. S17 and S18, Supplementary  
685 Table S13). Haplotype L0 commonly found in San people was the closest to archaic  
686 mtDNAs, consistent with the Neanderthal affinity with Y haplotype A. Haplotype G2 of  
687 JPT and M5a of SAS were top ranked non-L haplotypes in distance to Heidelbergensis in  
688 slow SNPs, consistent with the known admixed phenotypes of native Japanese and S.  
689 Asians. Relative to G2 that is common in South Asians and Tibetans, G1 is common in  
690 Russian far East and consistently closer to Altai in fast SNPs, indicating an adaptive role  
691 for fast SNPs. Consistent with the expected routes of human entry into America, D1  
692 common in Amerindians and Paleoamericans is closest to Altai in both slow and fast  
693 SNPs among the 4 archaic mtDNAs. As expected, haplotypes common in African groups

694 such as U6 and L3e are closer in slow SNPs to more African type archaic mtDNAs of  
695 Denisovan/Heidelbergensis, whereas those of Amerindians such as D1, D4 and A2 are  
696 closer to Neanderthals (Supplementary Table S14). Such analyses further indicate  
697 possible effects of archaic admixtures, with G2, I, T, and X2 affected by  
698 Denisovan/Heidelbergensis, and J, K2, and W by Neanderthals.

699 We next merged 1KG data with the AUA specific P4b1 and the Andamanese  
700 enriched M31a and found these haplotypes ranked among the top 13 in slow distance to  
701 Heidelbergensis (but 84th in fast SNPs), just following G and M5a among non-L  
702 haplotypes (Supplementary Fig. S19). Furthermore, they are uniquely much closer to  
703 Heidelbergensis/Denisovan than to Altai, consistent with being uniquely related to  
704 Denisovan among living people today.

705 As M is defined by 10398G and 8701G, both present in archaic humans, it likely  
706 resulted from admixture of R0 with archaic Africans. While the effect of archaic humans  
707 can also be observed for some haplotypes within R and N, the M haplogroup may be the  
708 most affected as indicated by its defining SNPs and the extensive sharing of alleles  
709 between L (now within M) and archaic humans. Consistently, the ~40000 year old  
710 Romanian Oase 1 had extensive Neanderthal admixture and carried an unusual N with  
711 the 8701G allele, indicating clear Neanderthal effect on its mtDNA [13]. The Oase 1  
712 mtDNA may be an intermediate in the transition from N/R to M. A modern N haplotype  
713 with 8701G allele is N21 common in Malays.

714

## 715 **Discussion**

716 We have arrived at a new model of modern human origins based on a more complete  
717 understanding of genetic diversity (Fig. 8). While the autosomes in our model are largely  
718 consistent with the multiregional hypothesis, the mtDNA and Y have a single origin in

719 East Asia. We also identified Negritos and Aboriginal Australians as direct descendants  
720 of Neanderthals/Denisovans who were African migrants with Eurasian admixtures.

721 In highly conserved proteins, mutation rate may be inherently slower, as indicated by  
722 the lower mutation saturation relative to fast evolving proteins. The nonsyn SNPs in slow  
723 genes as defined here are neutral [62]. They are not deleterious and unlike the stop  
724 codon and splicing SNPs. They are also not under positive selection as positively  
725 selected genes tend to be fast evolving. The random set of SNPs, traditionally viewed as  
726 neutral, were here shown in fact to be similar to stop codon and splicing SNPs. Under the  
727 neutral theory, the slow and fast SNPs should produce the same phylogenetic tree  
728 topology. To the dramatic difference between slow and fast evolving DNAs as shown  
729 here, we cannot come up with a meaningful explanation using any known schemes other  
730 than the MGD theory [37].

731 Previous studies using genome wide SNPs (random or fast set) suggest a serial  
732 founder effect model resulting from the expansion of modern humans out of Africa, with  
733 intra-population diversity decreasing relative to their geographical distance from Africa  
734 and diversity between populations increasing with the geographical distances separating  
735 them [74-76]. However, such observations could be explained by ascertainment bias and  
736 different levels of saturation and selection pressures among groups. The finding here of  
737 more shared alleles among populations for fast versus slow SNPs suggests that the large  
738 fraction of shared alleles among populations is due to saturation and parallel mutations in  
739 fast SNPs, which has also been found in previous studies where higher sharing of alleles  
740 was found for microsatellite markers versus autosomal SNPs (microsatellites have higher  
741 mutation rates) [75].

742 We have shown that there are only three major human groups, Africans, East Asians,  
743 and Europeans/Indians. PCA plots using slow SNPs showed the first major division was

744 between Africans and others (PC1), the second between East Asians and others (PC2),  
745 and third between South Asians and others (PC3). This supports the first split in humans  
746 to be between Africans and others, the second split between East Asians and others, and  
747 the third between South Asians and others. This indicates a Southern rather than  
748 Northern route for the first wave of AMH migration out of East Asia. The oldest AMH  
749 Ust'-Ishim clustered with South Asians. Also, the Y haplotype H of Indians diverged  
750 before diversification of European haplotypes, which is consistent with our model as well  
751 as the non-inhabitability for most parts of Europe during the Last Glacial Period.  
752 Aboriginal Australians and the related Negritos, traditionally viewed as the fourth major  
753 group, in fact consist of largely European/Indian and African genomes and their unique  
754 traits might have come from admixture of incoming Neanderthals with local archaic  
755 humans. Our calculation showed that the first major split of humans occurred 1.86-1.92  
756 myr ago, well consistent with fossil evidence for the presence of *Homo* in Eurasia and the  
757 multiregional model. The coexistence at ~1.76 myr ago in Africa of both Olduwan and  
758 Acheulean technologies suggests the coexistence of multiple groups of humans  
759 distinguished by separate stone-tool-making behaviors [97, 98]. The sudden appearance  
760 of Acheulean technologies and pro-Neanderthals at ~0.5 myr ago in Europe (Sima de los  
761 Huesos site of Atapuerca) can now be explained by a more recent out of Africa migration  
762 by the ancestors of Mbuti people [99, 100].

763 Mitochondrial DNA (mtDNA) and the non-recombination region of Y chr (NRY) lack  
764 recombination and provide records of history that are independent of autosomes. Most  
765 SNPs in these DNAs can be proven to be under selection, e.g. certain SNPs or  
766 haplotypes of mtDNA or Y chr are known to be related to human diseases or compatibility  
767 with nuclear genomes [43, 101-105]. Sharing of alleles of mtDNA or Y chr should mean  
768 similar selection, reflecting both environments and physiology or primarily physiology

769 when saturation has been reached. Sharing of physiology should be informative for a  
770 phonetic approach of phylogeny. Coevolution of mtDNA, Y, and autosomes has been  
771 found by many studies [43, 105-108], which may play a key role in the diversification into  
772 multiple haplotypes during AMH radiation from its place of origin to other regions by  
773 hybridization with archaic humans. People who have stayed relatively unchanged in  
774 physiology and living environments from the ancestor would be expected to have few  
775 deviations from the ancestor haplotype and their present day living place would indicate  
776 place of origin for the ancestor. It is through such reasoning that we have come to place  
777 the origin of modern Y and mtDNA in East Asia or Southern China. Our results showed  
778 that groups with the same Y or mtDNA haplotypes are also closer in autosomes and traits.  
779 The Y megahaplogroup ABCDE matches with the mtDNA megahaplogroup M. Such a  
780 *priori* sensible results provide strong independent validation for our new phylogenetic  
781 method.

782       Given that most SNPs in Y and mtDNA are not neutral, one cannot use the molecular  
783 clock approach to determine the age of the haplotypes except for recent diversifications.  
784 That the Y haplotype NO of the ~45,000 year old Ust'-Ishim differs from the putative  
785 ancestor F by only ~27 SNPs whereas a present day haplotype could differ from the F  
786 ancestor by as much as ~740 SNPs (Fig. 3) indicates that the ancestor F should not be  
787 much older than ~45,000 years. This relatively young age is remarkably consistent with  
788 the time point for the replacement of Neanderthals by AMH but appears to contradict the  
789 oldest AMH fossils in Africa or in Hunan China [21]. However, nearly all AMH fossils older  
790 than 40,000 years still have certain archaic features and independent evolution of  
791 modern features has been noted to occur periodically over the past 950,000 years since  
792 the time of *H. antecessor*[4, 109].



793 The novel concept here of modern replacing archaic versions of Y and mtDNA but  
794 not autosomes is key to our model of out of East Asia. The lack of recombination in Y and  
795 mtDNA makes this idea biologically inevitable. The fact that Heidelbergensis, Denisovans,  
796 Neanderthals, and AMH all have distinct mtDNAs suggests that such replacements may  
797 have taken place multiple times in the past. Modern examples consistent with the  
798 replacement idea are the dominant presence of Asian Z mtDNA in the Saami people of  
799 Northern Europe and the wide presence of Asian Y haplotype N in Finnish, who are  
800 otherwise largely indistinguishable from Europeans in both autosomes and traits. Also  
801 consistent is the finding of three super-grandfather Y haplotypes in China that are  
802 relatively young in age (~5000-7000 years) but account for ~40% of Han Chinese males  
803 today [110, 111]. Admixture of incoming Asian AMH with archaic humans in Europe or  
804 Africa would lead to haplotype diversification in Y and mtDNA while still maintaining  
805 regional specificity in autosomes and hence traits as traits are mostly determined by  
806 autosomes. Therefore, the multiregional model is fully compatible with any single origin  
807 model of mtDNA or Y chr and there is no real conflict between the timing of autosome  
808 diversification and the much more recent appearance of the modern mtDNA and Y.  
809 Interbreeding between modern and archaic humans may best explain certain human  
810 fossils near or within the era of AMH that show both archaic and modern features, such  
811 as *H. naledi* and the 'Red Deer Cave' people [112, 113].

812 The Out of Africa model requires uni-parental DNAs and autosomes to be both  
813 modern to qualify as AMH but our model only requires uni-parental DNAs. The Y tree  
814 topology shows features not consistent with the Out of Africa model. The Y tree shows  
815 haplotype I splitting before R from NO and so I should carry less Asian autosomes than R  
816 if the Out of Africa model is true but not if our model is. But, Europeans carrying I and R  
817 are not known to be different in autosomes. Also, the Out of Africa model has divergence

818 of Europeans and Asians in the Middle East. However, the Y tree shows West Asia  
819 haplotype J splitting after the differentiation of South Asia haplotype G, indicating  
820 differentiation of Eurasia types following type F to be in East Asia rather than West Asia,  
821 which is unexpected by the existing model. Recent ancient mtDNA studies found the  
822 earliest modern R to be close to the earliest fossil date of AMH at 45 ky ago and 5000  
823 years older than the earliest N, thus invalidating the existing tree and validating our Out of  
824 East Asia tree here [114].

825 The ~45,000-year-old AMH Ust'-Ishim from Siberia was previously found to have left  
826 no descendants among present populations and to be more related to East Asians than  
827 to Europeans/Indians [14]. However, our results showed this individual as Indians. This  
828 discrepancy is to be expected. It has been routinely found as surprising in previous  
829 studies on ancient DNAs that there is no genetic continuity between ancient and present  
830 day people. Such unexpected anomalies can now be understood as artifacts of using  
831 non-informative or fast SNPs which turned over quickly to be adaptive. We have verified  
832 this for most ancient European DNAs that while non-informative SNPs placed them as  
833 outliers, the slow SNPs as defined here all placed them as indistinguishable from present  
834 day Europeans.

835 Our finding of Neanderthals and Denisovans as primarily Africans with Eurasian  
836 admixture is well supported by fossil data indicating *H. heidelbergensis*, present in both  
837 Africa and Europe, as ancestors of Neanderthals. The taurodont teeth are common in  
838 Neanderthals, Heidelbergensis and certain South African fossils [115]. The occipital  
839 bunning of Neanderthals are also common in modern Africans [116]. Neanderthals are  
840 known to share multiple traits with Europeans such as the prominent shape and size of  
841 the nose [35, 117], which supports our finding that Neanderthals were often closer to  
842 Europeans than to E. Asians (8/10 examined here). Thus, traits and genotypes are

843 coupled after all as they should, unlike the strange and surprising conclusion of more  
844 Neanderthal alleles in East Asians than in Europeans as analyzed by using  
845 non-informative fast SNPs [11, 12]. Our result that Denisovan is nearly equally related to  
846 East Asians and Europeans (slightly more related to East Asians) is consistent with  
847 where Denisovan was found. Seemingly unexpectedly, certain Neanderthals found in  
848 Europe was most closely related to Asians (Vi33.25) or Americans (Vi33.26). However,  
849 this would be expected if Africans associated with the Neanderthal exit had entered Asia  
850 or South Asia via the Northern route from Siberia or possibly a Southern route. The  
851 general lack of Neanderthal fossils in this Southern route may reflect the relatively small  
852 effort so far invested in this region (with only few *Homo* fossil finds like Narmada from  
853 ~200 kya who is broadly classified as *H. heidelbergensis*). Indeed several fossils in China  
854 show Neanderthal features such as the inner-ear formation in the ~100 ky old *Xujijayao*  
855 and *Xuchang Man* [4, 118-120]. Certain mysterious Southern China fossils such as the 11  
856 -15.5 ky old 'Red Deer Cave' people with hybrid features of modern and archaic humans  
857 may also be candidates for Asian relatives of Neanderthals, especially considering their  
858 taurodont teeth [112]. Early modern human fossils with typical Mongoloid features in  
859 South West China (Liujiang, Ziyang, Lijiang, and Chuandong) also have weak occipital  
860 buns commonly found in Neanderthals [4, 119, 121]. Thus, although Neanderthals were  
861 mostly found in Europe and Middle East, they likely also made their way to North East  
862 Asia (Denisovan and Teshik-Tash) and South East Asia [122].

863 Fossils or traits indicating AMH migration from East Asia into Africa or Europe have  
864 been noted before. First, native Africans such as Khoisans are well known to have certain  
865 East Asian features such as shoveling teeth, epicanthic fold, and lighter skins. Mbuti  
866 pygmies look very much like the Andamanese. The much lower frequency of shoveling  
867 teeth in African fossils and Khoisan relative to ancient and modern Chinese suggests that

868 this type of teeth could only originate in China with its African presence due to migration.  
869 The type of shoveling teeth found in Neanderthals and Pleistocene *Homo* from  
870 Atapuerca-Sima de los Huesos may either be a different type from that of Asians and  
871 Africans or come from early disposal of *Homo* from Asia to Europe [123, 124]. Second, a  
872 combination of three features has been noted to be region-specific to China fossils with  
873 lower frequency also found in North Africa: a non-depressed nasal root, non-projecting  
874 perpendicularly oriented nasal bones and facial flatness [125]. Third, Dali man of China  
875 (~260 kya) had lower upper facial index and flat nasomolar angle, but these two modern  
876 features only first appeared in Europe in Cro Magnons (Xinzhi Wu, personal  
877 communication).

878 The appearance of modern humans should be accompanied by new technologies  
879 just as the knife type stone tools were associated with the first appearance of the genus  
880 *Homo*. A technology just one step more advanced than stone tools is pottery making.  
881 Consistent with our model, the earliest pottery making intended for practical usage was  
882 found in Hunan and the neighboring Jiangxi in Southern China at 18,000-20,000 years  
883 ago [126, 127]. While future investigations could extend the time even earlier, one should  
884 not expect a new technology to appear simultaneously with the first appearance of AMH  
885 since it would take time for the first modern humans to grow into a large enough  
886 population to be able to invent new cultures. It is also remarkable to note that the next  
887 new invention after pottery, rice or agriculture, also likely came from Hunan [128]. Hunan  
888 is also the site of the earliest fully modern human fossils [21]. Placing AMH origin in China  
889 is also in line with the observation that the best argument for regional continuity has been  
890 built using data from China [4]. The observation here that different modern Chinese  
891 people could have independent genetic lineages separated by hundreds of thousands of  
892 years is consistent with the morphological observation that *H. erectus* and *H. sapiens* in

893 Northern China are not identical to those in Southern China [129]. Among all East Asians  
894 examined here, the genomes of Hunan people were found most enriched in Africans.  
895 Therefore, our model of modern human origins in East Asia, in particular Hunan Province  
896 in China, provides a satisfying account of all relevant data.

897 The study here shows different genetic diversity levels in different human groups  
898 depending on different types of SNPs. Europeans show the lowest genetic diversity level  
899 in stop codon and splicing SNPs while Africans the highest, which has also been found in  
900 a recent study [130]. However, East Asians show the lowest genetic diversity in genome  
901 average and hence in non-coding sequences. Thus, different populations encounter  
902 different selective pressures, the precise nature of which would require future research.  
903 Already, however, some tentative hints emerge on the genetic basis of certain complex  
904 traits that are commonly thought to be culturally shaped. The difference in selective  
905 pressure on non-coding or regulatory regions versus proteins or parts is reminiscent of  
906 the thinking style difference between the East and West in philosophy and medicine, i.e.,  
907 the holistic versus the analytical [131]. The high genetic diversity of Africans may confer  
908 adaptive advantages as in high diversity in immunity [132].

909

## 910 **Conclusions:**

911 The MGD theory provides a more complete understanding of the long standing  
912 puzzle of what determines genetic diversity, which makes inferring human origins from  
913 genetic diversity patterns realistically possible. By better identification of phylogenetically  
914 informative genes and constraining neutral theory application to these genes, we provide  
915 strong molecular evidence for multiregional evolution of autosomes and for East Asia  
916 origin of modern Y and mtDNA. Further work utilizing the MGD theory is ongoing and may  
917 yield more surprising and yet satisfying results in human evolution.

918

919 **Abbreviations:**

920 AMH: anatomically modern humans

921 MGD: maximum genetic diversity

922 SNP: single nucleotide polymorphisms

923 AUA: Aboriginal Australian

924 PGD: pairwise genetic distance

925 PCA: principal component analysis

926 Myr: million years

927 AFR: African

928 ASN: East Asian

929 EUR: European

930 SAS: South Asian

931 ESN: Esen in Nigeria

932 GBR: British in England and Scotland

933 CHS: Southern Han Chinese

934 CHB: Han Chinese in Beijing

935 JPT: Japanese in Tokyo

936 BEB: Bengali from Bangladesh

937 YRI: Yoruba in Ibadan, Nigeria

938 CEU: Utah Residents with Northern and Western European Ancestry

939 LWK: Luhya in Webuye, Kenya

940

941 **Declarations:**

942

943 **Acknowledgements:**

944 We thank Shuhua Xu, Xitong Lu, Denghui Luo, Jie Liang and Xiaohua Tan for  
945 technical assistance. We thank Xinzhi Wu for sharing unpublished work. We are grateful  
946 to Mark Stoneking, Irina Pugach, David Reich, Joseph Pickrell, Arti Tandon, Sarah  
947 Tishkoff, Joseph Lachance, Philip Johnson, and Brenna Henn for sharing DNA datasets.  
948 Although not all analyses of these datasets were presented here, they have been helpful  
949 to make this work possible. We thank Xinzhi Wu, German Dzielbel, and Joseph Daniels  
950 for critical reading of the manuscript. We thank Feng Gao, Xing Gao, Yamei Hou, Wu Liu,  
951 Erik Trinkaus, Lingxia Zhao, and Changqing Zeng for valuable discussions.

952

953 **Funding:**

954 Supported by the National Natural Science Foundation of China grant 81171880, the  
955 National Basic Research Program of China grant 2011CB51001, and the Furong  
956 Scholars program (S. H.).

957

958 **Ethics approval and consent to participate:**

959 Not applicable.

960

961 **Consent for publication:**

962 Not applicable.

963

964

965 **Availability of data and material:**

966 The datasets generated and analyzed for this study are available in the Additional files.

967

968 **Author contributions:**

969 SH and DY designed the study. DW and JY identified the slow evolving proteins. DY,  
970 XL, YG, MW, YZ, ZZ, and SH performed data analyses. SH and DY wrote the manuscript  
971 and all authors made comments.

972

973 **Competing Interests:**

974 The authors declare that they have no competing interests that might be perceived to  
975 influence the results and/or discussion reported in this paper.

976 **References:**

- 977 [1] Stringer CB, Andrews P. Genetic and fossil evidence for the origin of modern  
978 humans. *Science* 1988;239:1263-8.
- 979 [2] Thorne AG, Wolpoff MH. Regional continuity in Australasian Pleistocene hominid  
980 evolution. *Am J Phys Anthropol* 1981;55:337-49.
- 981 [3] Wolpoff MH, Wu XZ, Thorne AG. Modern homo sapiens origins: a general theory  
982 of hominid evolution involving the fossil evidence from east Asia. New York: Alan R. Liss,  
983 1984.
- 984 [4] Wu X. On the origin of modern humans in China. *Quaternary International*  
985 2004;117:131-40.
- 986 [5] Blum MG, Jakobsson M. Deep divergences of human gene trees and models of  
987 human origins. *Mol Biol Evol* 2011;28:889-98.
- 988 [6] Hajdinjak M, Fu Q, Hubner A, Petr M, Mafessoni F, Grote S, et al. Reconstructing  
989 the genetic history of late Neanderthals. *Nature* 2018;555:652-6.
- 990 [7] Mendez FL, Poznik GD, Castellano S, Bustamante CD. The Divergence of  
991 Neandertal and Modern Human Y Chromosomes. *Am J Hum Genet* 2016;98:728-34.
- 992 [8] Thomson R, Pritchard JK, Shen P, Oefner PJ, Feldman MW. Recent common  
993 ancestry of human Y chromosomes: evidence from DNA sequence data. *Proc Natl Acad*  
994 *Sci U S A* 2000;97:7360-5.
- 995 [9] Wilder JA, Kingan SB, Mobasher Z, Pilkington MM, Hammer MF. Global patterns  
996 of human mitochondrial DNA and Y-chromosome structure are not influenced by higher  
997 migration rates of females versus males. *Nat Genet* 2004;36:1122-5.
- 998 [10] Cann RL, Stoneking AC, Wilson AC. Mitochondrial DNA and human evolution.  
999 *Nature* 1987;325:31-6.
- 1000 [11] Green RE, Krause J, et., al. A draft sequence of the Neandertal Genome.  
1001 *Science* 2010;328:710-22.
- 1002 [12] Meyer M, Kircher M, Gansauge MT, Li H, Racimo F, Mallick S, et al. A  
1003 High-Coverage Genome Sequence from an Archaic Denisovan Individual. *Science* 2012.
- 1004 [13] Fu Q, Hajdinjak M, Moldovan OT, Constantin S, Mallick S, Skoglund P, et al. An  
1005 early modern human from Romania with a recent Neanderthal ancestor. *Nature*  
1006 2015;524:216-9.



- 1007 [14] Fu Q, Li H, Moorjani P, Jay F, Slepchenko SM, Bondarev AA, et al. Genome  
1008 sequence of a 45,000-year-old modern human from western Siberia. *Nature*  
1009 2014;514:445-9.
- 1010 [15] Vernot B, Akey JM. Resurrecting surviving Neandertal lineages from modern  
1011 human genomes. *Science* 2014;343:1017-21.
- 1012 [16] Hublin JJ, Ben-Ncer A, Bailey SE, Freidline SE, Neubauer S, Skinner MM, et al.  
1013 New fossils from Jebel Irhoud, Morocco and the pan-African origin of *Homo sapiens*.  
1014 *Nature* 2017;546:289-92.
- 1015 [17] White TD, Asfaw B, DeGusta D, Gilbert H, Richards G, Suwa G, et al.  
1016 Pleistocene *Homo sapiens* from Middle Awash, Ethiopia. *Nature* 2003;423:742-7.
- 1017 [18] Mendez FL, Krahn T, Schrack B, Krahn AM, Veeramah KR, Woerner AE, et al.  
1018 An African American paternal lineage adds an extremely ancient root to the human Y  
1019 chromosome phylogenetic tree. *Am J Hum Genet* 2013;92:454-9.
- 1020 [19] Scerri EML, Thomas MG, Manica A, Gunz P, Stock JT, Stringer C, et al. Did Our  
1021 Species Evolve in Subdivided Populations across Africa, and Why Does It Matter?  
1022 *Trends Ecol Evol* 2018;33:582-94.
- 1023 [20] Bae CJ, Douka K, Petraglia MD. On the origin of modern humans: Asian  
1024 perspectives. *Science* 2017;358.
- 1025 [21] Liu W, Martinon-Torres M, Cai YJ, Xing S, Tong HW, Pei SW, et al. The earliest  
1026 unequivocally modern humans in southern China. *Nature* 2015;526:696-9.
- 1027 [22] Li ZY, Wu XJ, Zhou LP, Liu W, Gao X, Nian XM, et al. Late Pleistocene archaic  
1028 human crania from Xuchang, China. *Science* 2017;355:969-72.
- 1029 [23] Zhao L, Zhang L, Du B, Nian XM, Zheng Y, Zhang Z, et al. New discovery of  
1030 human fossils and associated mammal faunas in Bijie Guizhou. *Acta Anthropologica*  
1031 *Sinica* 2016;35:24-35.
- 1032 [24] Athreya S, Wu X. A multivariate assessment of the Dali hominin cranium from  
1033 China: Morphological affinities and implications for Pleistocene evolution in East Asia. *Am*  
1034 *J Phys Anthropol* 2017;164:679-701.
- 1035 [25] Hershkovitz I, Weber GW, Quam R, Duval M, Grun R, Kinsley L, et al. The  
1036 earliest modern humans outside Africa. *Science* 2018;359:456-9.
- 1037 [26] Groucutt HS, Grun R, Zalmout IAS, Drake NA, Armitage SJ, Candy I, et al.  
1038 *Homo sapiens* in Arabia by 85,000 years ago. *Nat Ecol Evol* 2018;2:800-9.
- 1039 [27] Curnoe D, Ji X, Shajin H, Tacon PSC, Li Y. Dental remains from Longtanshan  
1040 cave 1 (Yunnan, China), and the initial presence of anatomically modern humans in East  
1041 Asia. *Quaternary International* 2016;400:180-6.
- 1042 [28] Bae CJ, Wang W, Zhao J, Huang S, Tian F, Shen G. Modern human teeth from  
1043 Late Pleistocene Luna Cave (Guangxi, China). *Quaternary International*  
1044 2014;354:169-83.
- 1045 [29] Johnson MJ, Wallace DC, Ferris SD, Rattazzi MC, Cavalli-Sforza LL. Radiation  
1046 of human mitochondria DNA types analyzed by restriction endonuclease cleavage  
1047 patterns. *J Mol Evol* 1983;19:255-71.
- 1048 [30] Leffler EM, Bullaughey K, Matute DR, Meyer WK, Segurel L, Venkat A, et al.  
1049 Revisiting an old riddle: what determines genetic diversity levels within species? *PLoS*  
1050 *Biol* 2012;10:e1001388.
- 1051 [31] Hahn MW. Toward a selection theory of molecular evolution. *Evolution*  
1052 2008;62:255-65.
- 1053 [32] Kreitman M. The neutral theory is dead. Long live the neutral theory. *Bioessays*  
1054 1996;18:678-83; discussion 83.
- 1055 [33] Ohta T, Gillespie JH. Development of Neutral and Nearly Neutral Theories.  
1056 *Theor Popul Biol* 1996;49:128-42.

- 1057 [34] Ballard JW, Kreitman M. Is mitochondrial DNA a strictly neutral marker? Trends  
1058 Ecol Evol 1995;10:485-8.
- 1059 [35] Wolpoff MH, Caspari R. Race and Human Evolution: A Fatal Attraction. New  
1060 York: Simon & Schuster, 2007.
- 1061 [36] Mondal M, Casals F, Xu T, Dall'Olio GM, Pybus M, Netea MG, et al. Genomic  
1062 analysis of Andamanese provides insights into ancient human migration into Asia and  
1063 adaptation. Nat Genet 2016;48:1066-70.
- 1064 [37] Huang S. New thoughts on an old riddle: What determines genetic diversity  
1065 within and between species? Genomics 2016;108:3-10.
- 1066 [38] Zhu Z, Lu Q, Wang J, Huang S. Collective effects of common SNPs in foraging  
1067 decisions in *Caenorhabditis elegans* and an integrative method of identification of  
1068 candidate genes. Sci. Rep. 2015:doi:10.1038/srep16904.
- 1069 [39] Luo D, Huang S. The genetic equidistance phenomenon at the proteomic level.  
1070 Genomics 2016;108:25-30.
- 1071 [40] Zhu Z, Yuan D, Luo D, Lu X, Huang S. Enrichment of Minor Alleles of Common  
1072 SNPs and Improved Risk Prediction for Parkinson's Disease. PLoS ONE  
1073 2015;10:e0133421.
- 1074 [41] Zhu Z, Man X, Xia M, Huang Y, Yuan D, Huang S. Collective effects of SNPs on  
1075 transgenerational inheritance in *Caenorhabditis elegans* and budding yeast. Genomics  
1076 2015;106:23-9.
- 1077 [42] Biswas K, Chakraborty S, Podder S, Ghosh TC. Insights into the dN/dS ratio  
1078 heterogeneity between brain specific genes and widely expressed genes in species of  
1079 different complexity. Genomics 2016;108:11-7.
- 1080 [43] Zhu Z, Lu Q, Zeng F, Wang J, Huang S. Compatibility between mitochondrial  
1081 and nuclear genomes correlates with quantitative trait of lifespan in *Caenorhabditis*  
1082 *elegans*. Sci. Rep. 2015:doi:10.1038/srep17303.
- 1083 [44] Huang S. The overlap feature of the genetic equidistance result, a fundamental  
1084 biological phenomenon overlooked for nearly half of a century. Biological Theory  
1085 2010;5:40-52.
- 1086 [45] Huang S. Primate phylogeny: molecular evidence for a pongid clade excluding  
1087 humans and a prosimian clade containing tarsiers. Sci China Life Sci 2012;55:709-25.
- 1088 [46] Lei X, Yuan J, Zhu Z, Huang S. Collective effects of common SNPs and risk  
1089 prediction in lung cancer. Heredity 2018:doi:10.1038/s41437-018-0063-4.
- 1090 [47] Gui Y, Lei X, Huang S. Collective effects of common SNPs and genetic risk  
1091 prediction in type 1 diabetes. Clin Genet 2017;93:1069-74.
- 1092 [48] Yuan D, Zhu Z, Tan X, Liang J, Zeng C, Zhang J, et al. Scoring the collective  
1093 effects of SNPs: association of minor alleles with complex traits in model organisms. Sci  
1094 China Life Sci 2014;57:876-88.
- 1095 [49] Lei X, Huang S. Enrichment of minor allele of SNPs and genetic prediction of  
1096 type 2 diabetes risk in British population. PLoS ONE 2017;12:e0187644.
- 1097 [50] He P, Lei X, Yuan D, Zhu Z, Huang S. Accumulation of minor alleles and risk  
1098 prediction in schizophrenia. Sci Rep 2017;7:11661.
- 1099 [51] Huang S. Histone methylation and the initiation of cancer, Cancer Epigenetics.  
1100 New York: CRC Press, 2008.
- 1101 [52] Huang S. Inverse relationship between genetic diversity and epigenetic  
1102 complexity. Nature Precedings 2008:doi.org/10.1038/npre.2009.1751.2.
- 1103 [53] Kimura M. Evolutionary rate at the molecular level. Nature 1968;217:624-6.
- 1104 [54] King JL, Jukes TH. Non-Darwinian evolution. Science 1969;164:788-98.

- 1105 [55] Romiguier J, Gayral P, Ballenghien M, Bernard A, Cahais V, Chenuil A, et al.  
1106 Comparative population genomics in animals uncovers the determinants of genetic  
1107 diversity. *Nature* 2014;515:261-3.
- 1108 [56] Margoliash E. Primary structure and evolution of cytochrome c. *Proc. Natl. Acad.*  
1109 *Sci.* 1963;50:672-9.
- 1110 [57] Hu T, Long M, Yuan D, Zhu Z, Huang Y, Huang S. The genetic equidistance  
1111 result, misreading by the molecular clock and neutral theory and reinterpretation nearly  
1112 half of a century later. *Sci China Life Sci* 2013;56:254-61.
- 1113 [58] Huang S. The genetic equidistance result of molecular evolution is independent  
1114 of mutation rates. *J. Comp. Sci. Syst. Biol.* 2008;1:092-102.
- 1115 [59] Yuan D, Zhu Z, Tan X, Liang J, Zeng C, Zhang J, et al. Minor alleles of common  
1116 SNPs quantitatively affect traits/diseases and are under both positive and negative  
1117 selection. arXiv:1209.2911 2012.
- 1118 [60] Dunham I, Kundaje A, Aldred SF, Collins PJ, Davis CA, Doyle F, et al. An  
1119 integrated encyclopedia of DNA elements in the human genome. *Nature* 2012;489:57-74.
- 1120 [61] Prieto-Godino LL, Rytz R, Bargeton B, Abuin L, Arguello JR, Peraro MD, et al.  
1121 Olfactory receptor pseudo-pseudogenes. *Nature* 2016;539:93-7.
- 1122 [62] Wang M, Wang D, Yu J, Huang S. Enrichment in conservative amino acid  
1123 changes among fixed and standing missense variations in slow evolving genes. *bioRxiv*  
1124 2019;doi.org/10.1101/644666.
- 1125 [63] Pugach I, Delfin F, Gunnarsdottir E, Kayser M, Stoneking M. Genome-wide data  
1126 substantiate Holocene gene flow from India to Australia. *Proc Natl Acad Sci U S A*  
1127 2013;110:1803-8.
- 1128 [64] Li H, Handsaker B, Wysoker A, Fennell T, Ruan J, Homer N, et al. The  
1129 Sequence Alignment/Map format and SAMtools. *Bioinformatics* 2009;25:2078-9.
- 1130 [65] Danecek P, Auton A, Abecasis G, Albers CA, Banks E, DePristo MA, et al. The  
1131 variant call format and VCFtools. *Bioinformatics* 2011;27:2156-8.
- 1132 [66] McKenna A, Hanna M, Banks E, Sivachenko A, Cibulskis K, Kernysky A, et al.  
1133 The Genome Analysis Toolkit: a MapReduce framework for analyzing next-generation  
1134 DNA sequencing data. *Genome Res* 2010;20:1297-303.
- 1135 [67] Purcell S, Neale B, Todd-Brown K, Thomas L, Ferreira MAR, Bender D, et al.  
1136 PLINK: A tool set for whole-genome association and population-based linkage analyses.  
1137 *Am J Hum Genet* 2007;81:559-75.
- 1138 [68] Delaneau O, Zagury JF, Marchini J. Improved whole-chromosome phasing for  
1139 disease and population genetic studies. *Nat Methods* 2013;10:5-6.
- 1140 [69] Howie BN, Donnelly P, Marchini J. A flexible and accurate genotype imputation  
1141 method for the next generation of genome-wide association studies. *PLoS Genet*  
1142 2009;5:e1000529.
- 1143 [70] Zhu Z, Lu X, Yuan D, Huang S. Close genetic relationships between a spousal  
1144 pair with autism-affected children and high minor allele content in cases in  
1145 autism-associated SNPs. *Genomics* 2016;10.1016/j.ygeno.2016.12.001.
- 1146 [71] Yang J, Lee SH, Goddard ME, Visscher PM. GCTA: a tool for genome-wide  
1147 complex trait analysis. *Am J Hum Genet* 2011;88:76-82.
- 1148 [72] Lewontin R. The apportionment of human diversity. *Evolutionary Biology*  
1149 1972;6:391-8.
- 1150 [73] Auton A, Brooks LD, Durbin RM, Garrison EP, Kang HM, Korbel JO, et al. A  
1151 global reference for human genetic variation. *Nature* 2015;526:68-74.
- 1152 [74] Ramachandran S, Deshpande O, Roseman CC, Rosenberg NA, Feldman MW,  
1153 Cavalli-Sforza LL. Support from the relationship of genetic and geographic distance in

- 1154 human populations for a serial founder effect originating in Africa. *Proc Natl Acad Sci U S*  
1155 *A* 2005;102:15942-7.
- 1156 [75] Li JZ, Absher DM, Tang H, Southwick AM, Casto AM, Ramachandran S, et al.  
1157 Worldwide human relationships inferred from genome-wide patterns of variation. *Science*  
1158 2008;319:1100-4.
- 1159 [76] Conrad DF, Jakobsson M, Coop G, Wen X, Wall JD, Rosenberg NA, et al. A  
1160 worldwide survey of haplotype variation and linkage disequilibrium in the human genome.  
1161 *Nat Genet* 2006;38:1251-60.
- 1162 [77] Suwa G, Kono RT, Katoh S, Asfaw B, Beyene Y. A new species of great ape  
1163 from the late Miocene epoch in Ethiopia. *Nature* 2007;448:921-4.
- 1164 [78] Poznik GD, Henn BM, Yee MC, Sliwerska E, Euskirchen GM, Lin AA, et al.  
1165 Sequencing Y chromosomes resolves discrepancy in time to common ancestor of males  
1166 versus females. *Science* 2013;341:562-5.
- 1167 [79] Wilson Sayres MA, Lohmueller KE, Nielsen R. Natural selection reduced  
1168 diversity on human y chromosomes. *PLoS Genet* 2014;10:e1004064.
- 1169 [80] Teitz LS, Pyntikova T, Skaletsky H, Page DC. Selection Has Countered High  
1170 Mutability to Preserve the Ancestral Copy Number of Y Chromosome Amplicons in  
1171 Diverse Human Lineages. *Am J Hum Genet* 2018;103:261-75.
- 1172 [81] Poznik GD, Xue Y, Mendez FL, Willems TF, Massaia A, Wilson Sayres MA, et al.  
1173 Punctuated bursts in human male demography inferred from 1,244 worldwide  
1174 Y-chromosome sequences. *Nat Genet* 2016;48:593-9.
- 1175 [82] Mallick S, Li H, Lipson M, Mathieson I, Gymrek M, Racimo F, et al. The Simons  
1176 Genome Diversity Project: 300 genomes from 142 diverse populations. *Nature*  
1177 2016;538:201-6.
- 1178 [83] Karmin M, Saag L, Vicente M, Wilson Sayres MA, Jarve M, Talas UG, et al. A  
1179 recent bottleneck of Y chromosome diversity coincides with a global change in culture.  
1180 *Genome Res* 2015;25:459-66.
- 1181 [84] Black ML, Wise CA, Wang W, Bittles AH. Combining genetics and population  
1182 history in the study of ethnic diversity in the People's Republic of China. *Hum Biol*  
1183 2006;78:277-93.
- 1184 [85] Fu Q, Posth C, Hajdinjak M, Petr M, Mallick S, Fernandes D, et al. The genetic  
1185 history of Ice Age Europe. *Nature* 2016;534:200-5.
- 1186 [86] Lazaridis I, Nadel D, Rollefson G, Merrett DC, Rohland N, Mallick S, et al.  
1187 Genomic insights into the origin of farming in the ancient Near East. *Nature*  
1188 2016;536:419-24.
- 1189 [87] Teske PR, Golla TR, Sandoval-Castillo J, Emami-Khoyi A, van der Lingen CD,  
1190 von der Heyden S, et al. Mitochondrial DNA is unsuitable to test for isolation by distance.  
1191 *Sci Rep* 2018;8:8448.
- 1192 [88] Towarnicki SG, Ballard JWO. Mitotype Interacts With Diet to Influence Longevity,  
1193 Fitness, and Mitochondrial Functions in Adult Female *Drosophila*. *Front Genet*  
1194 2018;9:593.
- 1195 [89] de Manuel M, Kuhlwilm M, Frandsen P, Sousa VC, Desai T, Prado-Martinez J,  
1196 et al. Chimpanzee genomic diversity reveals ancient admixture with bonobos. *Science*  
1197 2016;354:477-81.
- 1198 [90] Amos W. Testing an alternative explanation for relatively greater base-sharing  
1199 between Neanderthals and non-African humans. *bioRxiv* 2017:doi:  
1200 <https://doi.org/10.1101/133306>.
- 1201 [91] Prufer K, Racimo F, Patterson N, Jay F, Sankararaman S, Sawyer S, et al. The  
1202 complete genome sequence of a Neanderthal from the Altai Mountains. *Nature*  
1203 2014;505:43-9.



- 1204 [92] Prufer K, de Filippo C, Grote S, Mafessoni F, Korlevic P, Hajdinjak M, et al. A  
1205 high-coverage Neandertal genome from Vindija Cave in Croatia. *Science*  
1206 2017;358:655-8.
- 1207 [93] Schuster SC, Miller W, Ratan A, Tomsho LP, Giardine B, Kasson LR, et al.  
1208 Complete Khoisan and Bantu genomes from southern Africa. *Nature* 2010;463:943-7.
- 1209 [94] Gallego Llorente M, Jones ER, Eriksson A, Siska V, Arthur KW, Arthur JW, et al.  
1210 Ancient Ethiopian genome reveals extensive Eurasian admixture throughout the African  
1211 continent. *Science* 2015;350:820-2.
- 1212 [95] Rasmussen M, Guo X, Wang Y, Lohmueller KE, Rasmussen S, Albrechtsen A,  
1213 et al. An Aboriginal Australian genome reveals separate human dispersals into Asia.  
1214 *Science* 2011;334:94-8.
- 1215 [96] Meyer M, Fu Q, Aximu-Petri A, Glocke I, Nickel B, Arsuaga JL, et al. A  
1216 mitochondrial genome sequence of a hominin from Sima de los Huesos. *Nature*  
1217 2014;505:403-6.
- 1218 [97] Lepre CJ, Roche H, Kent DV, Harmand S, Quinn RL, Brugal J-P, et al. An earlier  
1219 origin for the Acheulian. *Nature* 2011;477:82-5.
- 1220 [98] Asfaw B, Gilbert WH, Beyene Y, Hart WK, Renne PR, Gabriel GW, et al.  
1221 Remains of *Homo erectus* from Bouri, middle Awash, Ethiopia. *Nature* 2002;416:317-20.
- 1222 [99] Bischoff JL, Williams RW, Rosenbauer RJ, Aramburu A, Arsuaga JL, Garcia N,  
1223 et al. High-resolution U-series dates from the Sima de los Huesos hominids yields 600+/-  
1224 kyrs: implications for the evolution of the early Neanderthal lineage. *J. Archaeol. Sci.*  
1225 2007;34:763-70.
- 1226 [100] Lycett SJ. Understanding ancient hominin dispersals using artefactual data: a  
1227 phylogeographic analysis of Acheulean handaxes. *PLoS ONE* 2009;4:e7404.
- 1228 [101] Shoffner JM, Brown MD, Torroni A, Lott MT, Cabell MF, Mirra SS, et al.  
1229 Mitochondrial DNA variants observed in Alzheimer disease and Parkinson disease  
1230 patients. *Genomics* 1993;17:171-84.
- 1231 [102] van der Walt JM, Nicodemus KK, Martin ER, Scott WK, Nance MA, Watts RL,  
1232 et al. Mitochondrial polymorphisms significantly reduce the risk of Parkinson disease. *Am*  
1233 *J Hum Genet* 2003;72:804-11.
- 1234 [103] Picard M, Wallace DC, Burelle Y. The rise of mitochondria in medicine.  
1235 *Mitochondrion* 2016;30:105-16.
- 1236 [104] Charchar FJ, Bloomer LD, Barnes TA, Cowley MJ, Nelson CP, Wang Y, et al.  
1237 Inheritance of coronary artery disease in men: an analysis of the role of the Y  
1238 chromosome. *Lancet* 2012;379:915-22.
- 1239 [105] Sloan DB, Havird JC, Sharbrough J. The On-Again, Off-Again Relationship  
1240 between Mitochondrial Genomes and Species Boundaries. *Mol Ecol* 2016.
- 1241 [106] Osada N, Akashi H. Mitochondrial-nuclear interactions and accelerated  
1242 compensatory evolution: evidence from the primate cytochrome C oxidase complex. *Mol*  
1243 *Biol Evol* 2012;29:337-46.
- 1244 [107] Gemmell NJ, Sin FY. Mitochondrial mutations may drive Y chromosome  
1245 evolution. *Bioessays* 2002;24:275-9.
- 1246 [108] Rand DM, Haney RA, Fry AJ. Cytonuclear coevolution: the genomics of  
1247 cooperation. *Trends Ecol Evol* 2004;19:645-53.
- 1248 [109] Bermudez de Castro JM, Arsuaga JL, Carbonell E, Rosas A, Martinez I,  
1249 Mosquera M. A hominid from the lower Pleistocene of Atapuerca, Spain: possible  
1250 ancestor to Neandertals and modern humans. *Science* 1997;276:1392-5.
- 1251 [110] Yan S, Wang CC, Zheng HX, Wang W, Qin ZD, Wei LH, et al. Y chromosomes  
1252 of 40% Chinese descend from three Neolithic super-grandfathers. *PLoS ONE*  
1253 2014;9:e105691.

- 1254 [111] He P, Chen N, Hu Z, Zhu Z, Xia K, Huang S. Neolithic super-grandfather Y  
1255 haplotypes, their related surnames, and autism spectrum disorder. *bioRxiv*  
1256 2017;<https://doi.org/10.1101/077222>.
- 1257 [112] Curnoe D, Xueping J, Herries AI, Kanning B, Tacon PS, Zhende B, et al.  
1258 Human remains from the Pleistocene-Holocene transition of southwest China suggest a  
1259 complex evolutionary history for East Asians. *PLoS ONE* 2012;7:e31918.
- 1260 [113] Berger LR, Hawks J, de Ruiter DJ, Churchill SE, Schmid P, Delezene LK, et al.  
1261 *Homo naledi*, a new species of the genus *Homo* from the Dinaledi Chamber, South Africa.  
1262 *Elife* 2015;4.
- 1263 [114] Zhang Y, Huang S. The out of East Asia model versus the African Eve model of  
1264 modern human origins in light of ancient mtDNA findings. *bioRxiv*  
1265 2019;[doi/10.1101/546234](https://doi.org/10.1101/546234).
- 1266 [115] Shaw JC. Taurodont Teeth in South African Races. *J Anat* 1928;62:476-98 1.
- 1267 [116] Liu W, Mbuja E, Wu X, Zhang Y. Comparisons of cranial features between  
1268 Chinese and African holocene humans and their implications. *Acta Anthropologica Sinica*  
1269 2003;22:89-104.
- 1270 [117] Thorne AG, Wolpoff MH. The multiregional evolution of humans. *Sci Am*  
1271 1992;266:76-9, 82-3.
- 1272 [118] Wu XJ, Crevecoeur I, Liu W, Xing S, Trinkaus E. Temporal labyrinths of  
1273 eastern Eurasian Pleistocene humans. *Proc Natl Acad Sci U S A* 2014;111:10509-13.
- 1274 [119] Wu X. Comparative study of early *Homo sapiens* from China and Europe. *Acta*  
1275 *Anthropologica Sinica* 1988;7:287-93.
- 1276 [120] Li ZY, Wu XJ, Zhou LP, Liu W, Gao X, Nian XM, et al. Late Pleistocene archaic  
1277 human crania from Xuchang, China. *Science* 2017;355:969-72.
- 1278 [121] Wu X, Poirier FE. Human evolution in China: a metric description of the fossils  
1279 and a review of the sites. Oxford: Oxford University Press, 1995.
- 1280 [122] Gunz P, Bulygina E. The Mousterian child from Teshik-Tash is a Neanderthal:  
1281 a geometric morphometric study of the frontal bone. *Am J Phys Anthropol*  
1282 2012;149:365-79.
- 1283 [123] Martinon-Torres M, Bermudez de Castro JM, Gomez-Robles A, Arsuaga JL,  
1284 Carbonell E, Lordkipanidze D, et al. Dental evidence on the hominin dispersals during the  
1285 Pleistocene. *Proc Natl Acad Sci U S A* 2007;104:13279-82.
- 1286 [124] Wolpoff MH. *Human Evolution*. New York: McGraw-Hill, Inc, 1996.
- 1287 [125] Brauer G, Stringer C. *Models, polarization, and perspectives on modern human*  
1288 *origins*. New York: Aldine de Gruyter, 1997.
- 1289 [126] Boaretto E, Wu X, Yuan J, Bar-Yosef O, Chu V, Pan Y, et al. Radiocarbon  
1290 dating of charcoal and bone collagen associated with early pottery at Yuchanyan Cave,  
1291 Hunan Province, China. *Proc Natl Acad Sci U S A* 2009;106:9595-600.
- 1292 [127] Wu X, Zhang C, Goldberg P, Cohen D, Pan Y, Arpin T, et al. Early pottery at  
1293 20,000 years ago in Xianrendong Cave, China. *Science* 2012;336:1696-700.
- 1294 [128] Zhang W, Yuan J. A preliminary study of ancient excavated rice from  
1295 Yuchanyan site, Dao County, Hunan Province, P.R.China. *Acta Agronomica Sinica*  
1296 1998;24:416-20.
- 1297 [129] Wu R, Wu X. *Paleolithic Sites In China*. Shanghai Scientific and Technological  
1298 Education Publishing House, 1999.
- 1299 [130] Lek M, Karczewski KJ, Minikel EV, Samocha KE, Banks E, Fennell T, et al.  
1300 Analysis of protein-coding genetic variation in 60,706 humans. *Nature* 2016;536:285-91.
- 1301 [131] Nisbett RE, Peng K, Choi I, Norenzayan A. Culture and systems of thought:  
1302 holistic versus analytic cognition. *Psychol Rev* 2001;108:291-310.

1303 [132] Nemat-Gorgani N, Hilton HG, Henn BM, Lin M, Gignoux CR, Myrick JW, et al.  
1304 Different Selected Mechanisms Attenuated the Inhibitory Interaction of KIR2DL1 with  
1305 C2(+) HLA-C in Two Indigenous Human Populations in Southern Africa. J Immunol  
1306 2018;200:2640-55.

1307  
1308

1309

1310  
1311

1312 **Tables:**  
1313

1314 **Table 1. Sharing of different types of SNPs among three groups.** Shared SNPs are  
1315 present in more than one group and unique SNPs are present in only one group. Shown  
1316 are fractions of each type of SNPs. SNPs that are not found in any of the three groups  
1317 (AFR, ASN, and EUR) are grouped as no variations (No var.).

1318

|                    | Shared | Unique | No var. | #SNPs  |
|--------------------|--------|--------|---------|--------|
| <b>Nonsyn slow</b> | 0.05   | 0.66   | 0.29    | 15422  |
| <b>Syn slow</b>    | 0.11   | 0.64   | 0.24    | 16591  |
| <b>Random set</b>  | 0.24   | 0.52   | 0.24    | 254489 |

1319

1320

1321

1322 **Table 2. Time of divergence between human populations.** The separation time and  
1323 average pairwise genetic distance (total distance including both het and hom distances)  
1324 between human populations (ESN, GBR, CHS) in 9578 slow evolving autosome SNPs  
1325 located in the 178 genes (>99% and <100% identity between human and Macca) with  
1326 total length 291083 aa. The human mutation rate was estimated as  $4.57E-5$  aa/myr/aa x  
1327 291083 aa = 13.32 aa/myr.

1328

1329

| Groups | Myr (total # of aa mismatches) |              |              |
|--------|--------------------------------|--------------|--------------|
|        | ESN                            | GBR          | CHS          |
| ESN    | 1.77 (47.21)                   | 1.92 (51.03) | 1.86 (49.62) |
| GBR    |                                | 1.53 (40.65) | 1.61 (42.8)  |
| CHS    |                                |              | 1.4 (37.19)  |

1330



1331  
1332  
1333  
1334

**Table 3. Sharing of Y chr alleles between Neanderthals and modern humans**

| Haplotypes | Mezmaiskaya2 |         |          | Spy94 |         |          | EI Sidron |         |          |
|------------|--------------|---------|----------|-------|---------|----------|-----------|---------|----------|
|            | #SNPs        | #Shared | Fraction | #SNPs | #Shared | Fraction | #SNPs     | #Shared | Fraction |
| A          | 4            | 2       | 0.5      | 1     | 1       | 1        | 4         | 3       | 0.75     |
| A0         | 3            | 3       | 1        |       |         |          | 3         | 2       | 0.67     |
| AB         | 2            | 1       | 0.5      |       |         |          | 1         | 1       | 1        |
| ABCDE      | 2            | 2       | 1        | 2     | 2       | 1        | 2         | 2       | 1        |
| B          | 2            | 0       | 0        | 1     | 0       | 0        |           |         |          |
| C          | 4            | 0       | 0        | 2     | 0       | 0        |           |         |          |
| D2         | 8            | 0       | 0        | 3     | 0       | 0        |           |         |          |
| E          | 14           | 0       | 0        | 7     | 0       | 0        | 1         | 1       | 1        |
| G          | 3            | 0       | 0        | 4     | 0       | 0        | 1         | 0       | 0        |
| H1         | 8            | 0       | 0        | 7     | 0       | 0        |           |         |          |
| I1         | 3            | 0       | 0        | 2     | 0       | 0        |           |         |          |
| IJ         | 2            | 0       | 0        |       |         |          |           |         |          |
| J          | 2            | 0       | 0        |       |         |          |           |         |          |
| L          | 2            | 0       | 0        | 2     | 0       | 0        |           |         |          |
| LT         | 3            | 0       | 0        |       |         |          |           |         |          |
| N          | 4            | 0       | 0        | 2     | 0       | 0        |           |         |          |
| O          | 12           | 0       | 0        | 5     | 0       | 0        |           |         |          |
| Q          |              |         |          | 1     | 0       | 0        |           |         |          |
| QR         | 3            | 0       | 0        |       |         |          | 1         | 0       | 0        |
| R1a        | 12           | 0       | 0        | 2     | 0       | 0        | 1         | 0       | 0        |
| T          | 9            | 0       | 0        | 6     | 0       | 0        |           |         |          |

1335  
1336  
1337

1338 **Figure legends:**

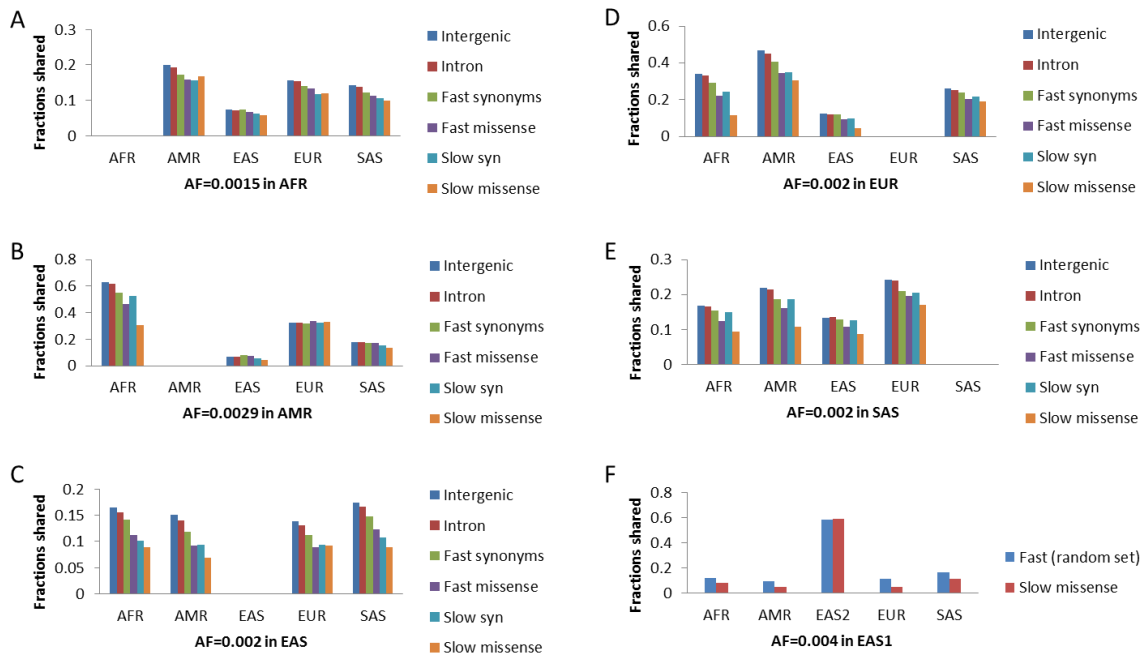

1339

1340 **Figure 1. Sharing of SNPs among different racial groups.** The fractions of shared

1341 SNPs in each racial group are shown for SNPs with alternative allele appearing only twice

1342 in AFR (A), AMR (B), EAS (C), EUR (D), SAS (E), or EAS1. EAS1 and EAS2 were two

1343 randomly divided subgroups of EAS. These SNPs were classified based on evolutionary

1344 rates as indicated.

1345

1346

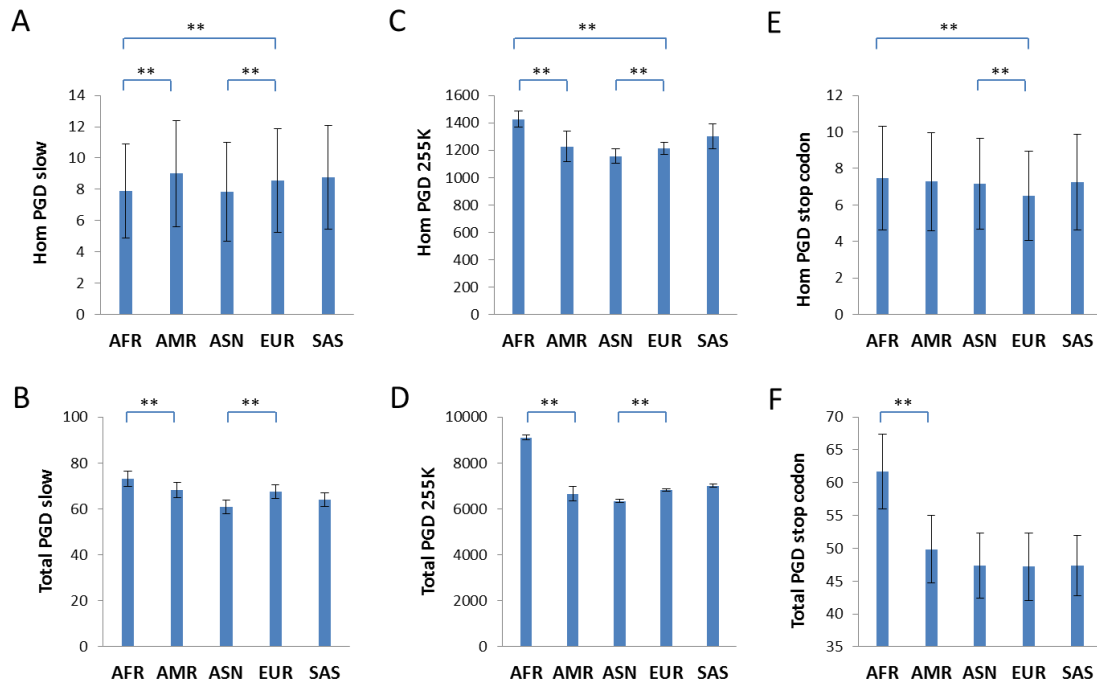

1347

1348 **Figure 2. Pairwise genetic distance as measured by different types of SNPs.**

1349 Pairwise genetic distance (PGD), either by homozygous mismatches (Hom) or by both  
 1350 homozygous and heterozygous mismatches (Total), as measured by three different types  
 1351 of SNPs is shown for each of the 5 major human groups in the 1KG. Known heavily  
 1352 admixed groups such as ASW and ACB in the African group or CLM and PUR in the  
 1353 American group were excluded in the analysis. Data are means with standard deviation.

1354 \*\*, P < 0.01, t test, 2 tailed.

1355

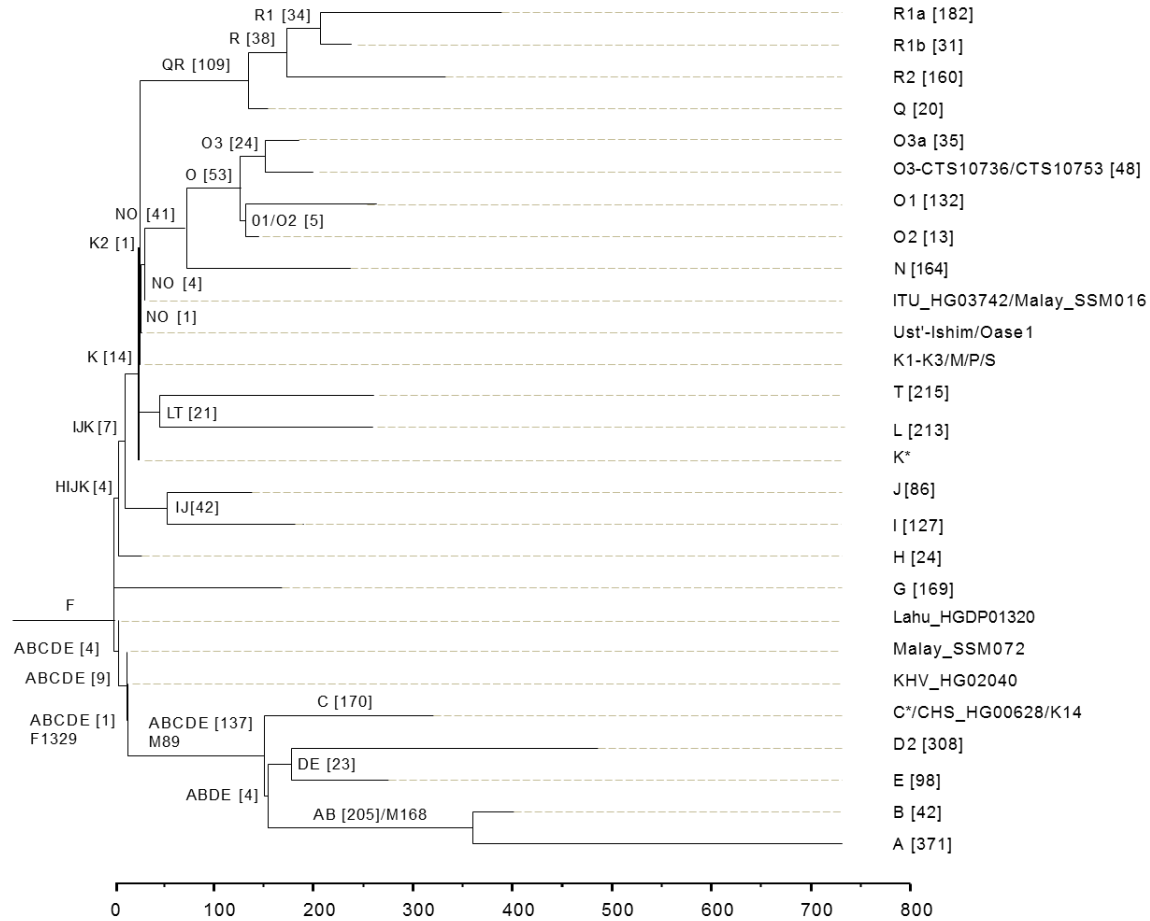

1356

1357 **Figure 3. Y chromosome phylogeny.** Branch lengths are drawn proportional to the  
 1358 number of SNPs. Only major haplogroups are shown with defining SNPs indicated for  
 1359 some. Numbers in parenthesis indicate the number of SNPs defining a haplogroup  
 1360 among the 58251 cleanly called SNPs in the 1KG. Individuals with few changes from an  
 1361 ancestor haplotype are also listed as shown.

1362

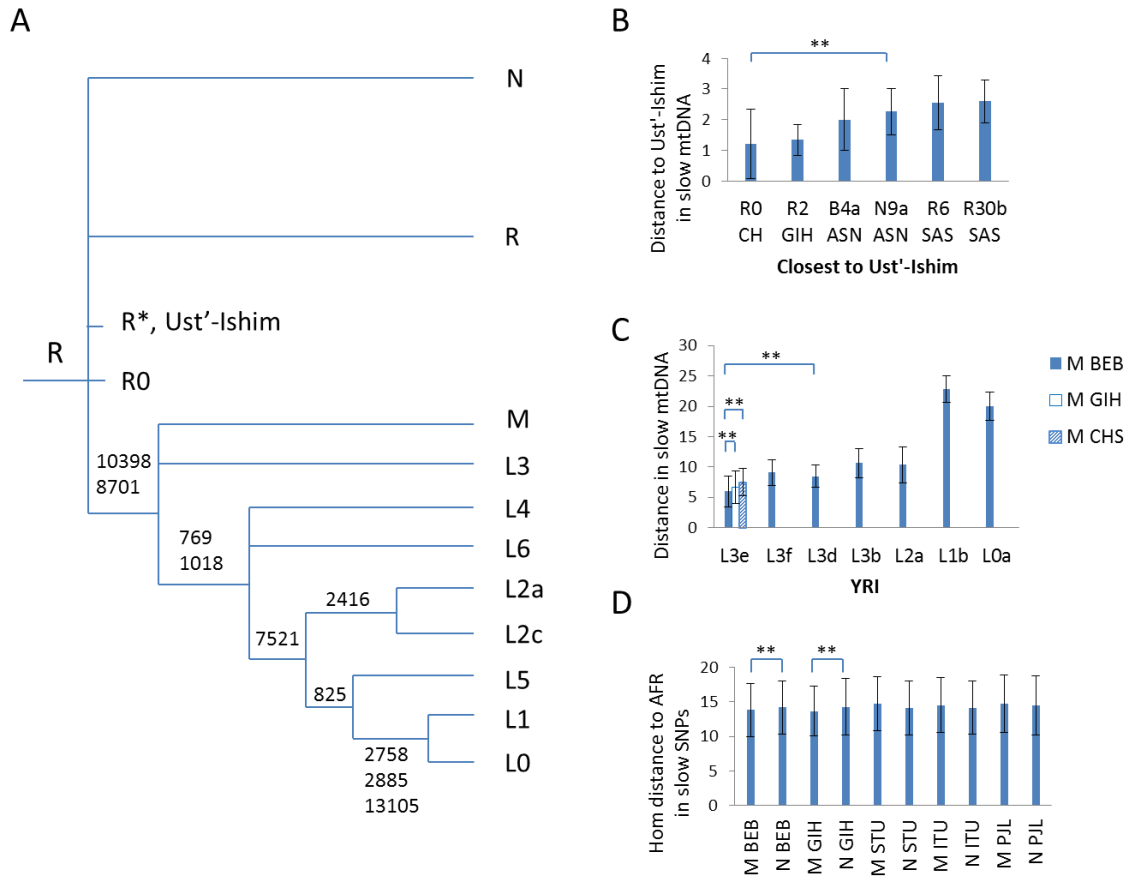

1363

1364 **Figure 4. mtDNA phylogeny.** (a) The mtDNA tree was drawn using slow evolving SNPs  
 1365 as indicated with the common ancestor haplotype defined as being closest to the ~45,000  
 1366 year old Ust'-Ishim. Only major branches are shown and no slow SNPs could be found to  
 1367 separate N and R. (b) Genetic distance in slow mtDNA SNPs to Ust'-Ishim mtDNA for  
 1368 haplotypes in 1KG. Only the closest few are shown. (c) Genetic distance in slow mtDNA  
 1369 SNPs to the M haplotype in BEB, GIH, or CHS for different L haplotypes in the YRI  
 1370 group.(d) Genetic distance in slow autosomal SNPs to individuals of South Asian BEB (or  
 1371 GIH, STU, ITU, PJI) carrying either the M or N haplotype. Data are means with standard  
 1372 deviation. \*\*,  $P < 0.01$ , t test, 2 tailed.

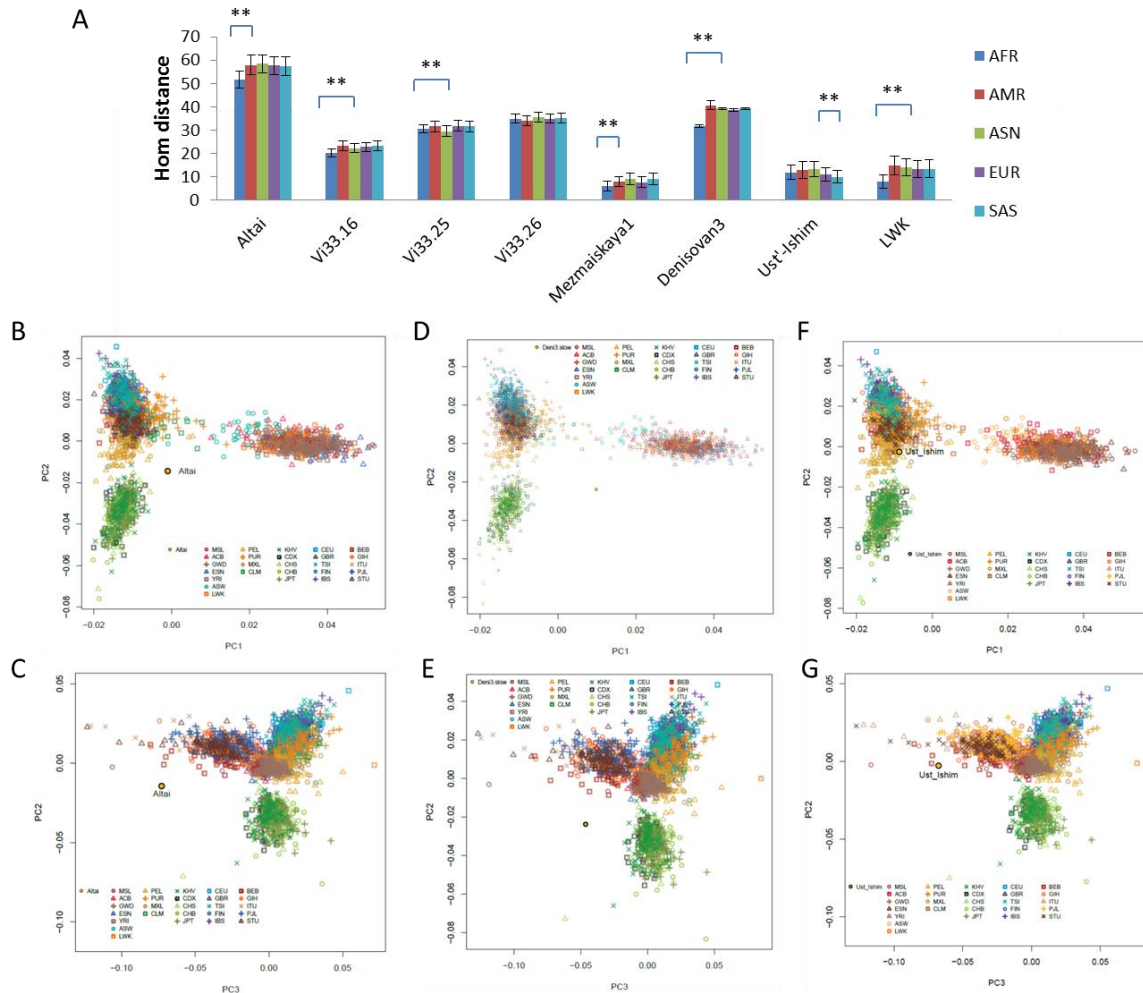

1373

1374 **Figure 5. Autosomal relationship between archaic and modern humans.** (a) Shown  
 1375 are the genetic distances between the 5 groups of 1KG and Neanderthals, Denisovan3,  
 1376 Ust'-Ishim, or the modern African group LWK. Data are means with standard deviation.  
 1377 (b-g) PCA plot analyses (b, d, f for PC1-PC2; c, e, g for PC3-PC2) for Altai, Denisovan3,  
 1378 or Ust'-Ishim merged with 1KG. \*\*, P<0.01, t test, 2 tailed.

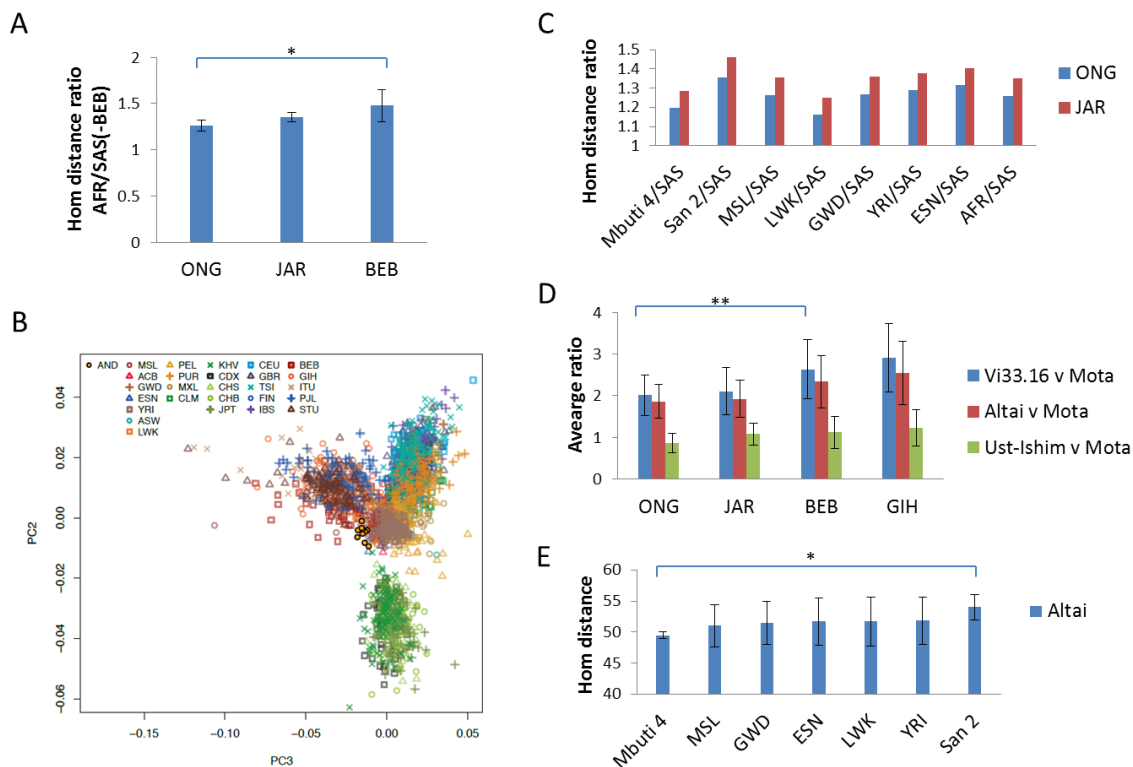

1379

1380

1381 **Figure 6. Origin of Negritos.**(a) Shown are the ratios of ONG, JAR, or BEB autosomal

1382 distance to AFR versus SAS(-BEB). SAS (-BEB) excluded the BEB group from SAS

1383 groups. (b) PCA plot (PC3-PC2) analysis of 10 Andamanese and 1KG using slow

1384 autosomal SNPs. (c) Shown are the ratios of ONG or JAR autosomal distance to African

1385 groups versus SAS. (d) Hom distance ratio of ancient humans versus the Mota African for

1386 four South Asian groups (ONG, BEB, GIH, JAR). (e) Autosomal distance between Altai

1387 and various African groups. Data are means with standard deviation. \*\*, P<0.01, t test or

1388 chi-squared test, 2 tailed.

1389

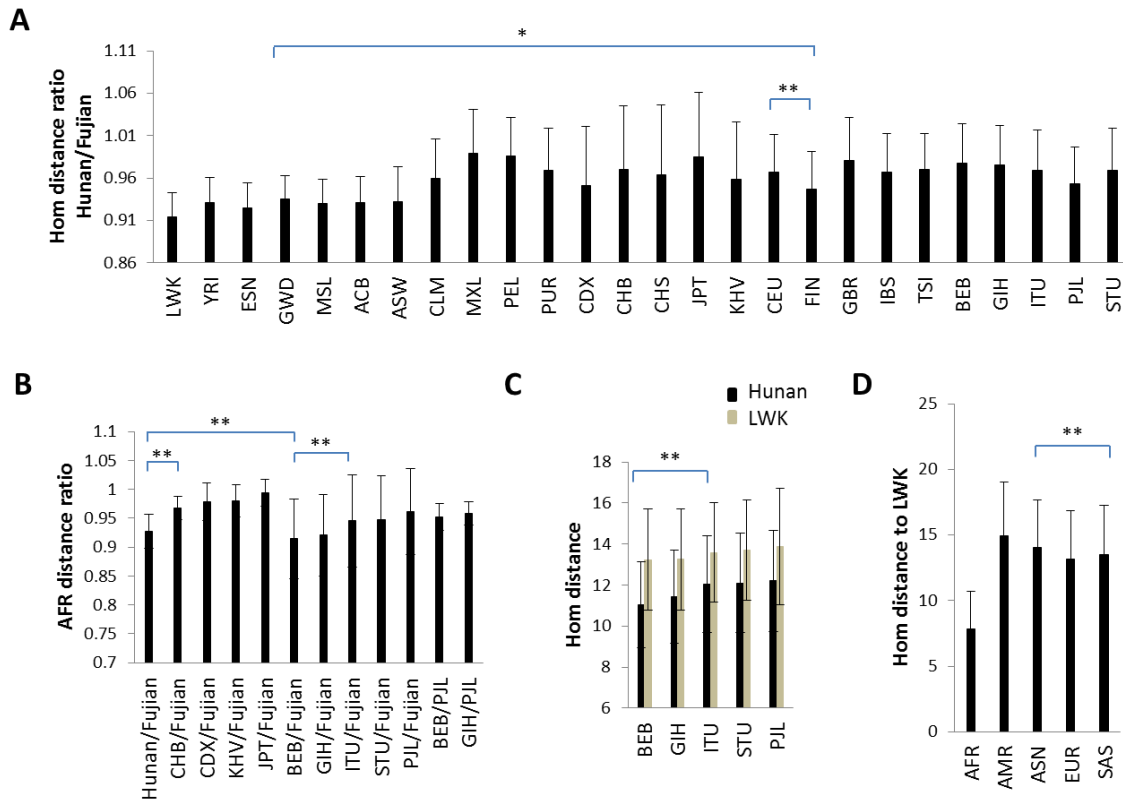

1390

1391 **Figure 7. Hunan ancestry in Africans.** (a) Ratios of autosomal distance to Hunan  
 1392 versus Fujian for each of the 25 groups in 1KG. (b) Ratios of autosomal distance to  
 1393 Hunan (or other East Asian and South Asian groups in 1KG) versus Fujian. (c) Autosomal  
 1394 distance to Hunan or LWK for various South Asian groups. (d) Autosomal distance to  
 1395 LWK for the 5 groups in 1KG. \*\*,  $P < 0.01$ , \*,  $P < 0.05$ , t test or chi-squared test, 2 tailed.  
 1396 Standard deviations are shown.

1397



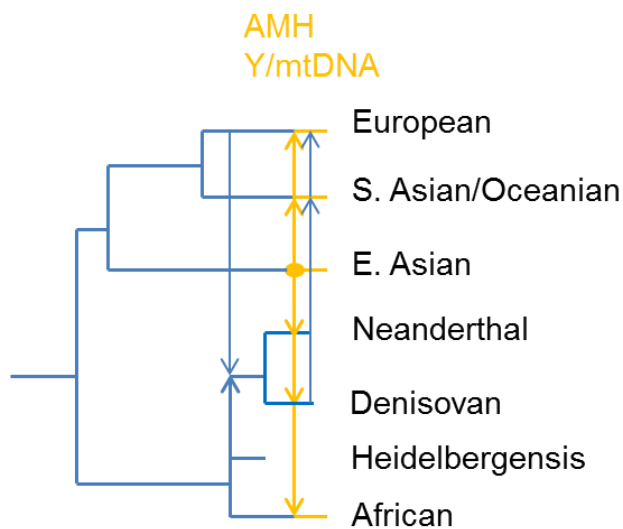

1398

1399 **Figure 8. Model of human evolution.** A schematic tree showing the phylogenetic  
1400 relationship of major human groups, including Africans, East Asians, South  
1401 Asians/Oceanians, Europeans, Heidelbergensis, Neanderthals, and Denisovans.

1402
